# Supplementary material for: Clonality, inbreeding, and hybridization in two extremotolerant black yeasts
Source: PubMed Central journal article supplement (PMC9535773; doi:10.1093/gigascience/giac095), 2022-10-06

|                                                      |                                                                                                                                                                                                                                                                                                                                                                                                                                                                                                                                                                                                                                                                                                                                                                                                                                                                                                                                                                                                                                                                                                                                                                                                                                                                                                                                                                                                                                                                                                                                                                                                                                                                                                                                                                                                                                                                                                                |                           |
|------------------------------------------------------|----------------------------------------------------------------------------------------------------------------------------------------------------------------------------------------------------------------------------------------------------------------------------------------------------------------------------------------------------------------------------------------------------------------------------------------------------------------------------------------------------------------------------------------------------------------------------------------------------------------------------------------------------------------------------------------------------------------------------------------------------------------------------------------------------------------------------------------------------------------------------------------------------------------------------------------------------------------------------------------------------------------------------------------------------------------------------------------------------------------------------------------------------------------------------------------------------------------------------------------------------------------------------------------------------------------------------------------------------------------------------------------------------------------------------------------------------------------------------------------------------------------------------------------------------------------------------------------------------------------------------------------------------------------------------------------------------------------------------------------------------------------------------------------------------------------------------------------------------------------------------------------------------------------|---------------------------|
| <b>Manuscript Number:</b>                            | GIGA-D-22-00073R1                                                                                                                                                                                                                                                                                                                                                                                                                                                                                                                                                                                                                                                                                                                                                                                                                                                                                                                                                                                                                                                                                                                                                                                                                                                                                                                                                                                                                                                                                                                                                                                                                                                                                                                                                                                                                                                                                              |                           |
| <b>Full Title:</b>                                   | Clonality, inbreeding, and hybridization in two extremotolerant black yeasts                                                                                                                                                                                                                                                                                                                                                                                                                                                                                                                                                                                                                                                                                                                                                                                                                                                                                                                                                                                                                                                                                                                                                                                                                                                                                                                                                                                                                                                                                                                                                                                                                                                                                                                                                                                                                                   |                           |
| <b>Article Type:</b>                                 | Research                                                                                                                                                                                                                                                                                                                                                                                                                                                                                                                                                                                                                                                                                                                                                                                                                                                                                                                                                                                                                                                                                                                                                                                                                                                                                                                                                                                                                                                                                                                                                                                                                                                                                                                                                                                                                                                                                                       |                           |
| <b>Funding Information:</b>                          | Javna Agencija za Raziskovalno Dejavnost RS (MRIC UL I0-0022)                                                                                                                                                                                                                                                                                                                                                                                                                                                                                                                                                                                                                                                                                                                                                                                                                                                                                                                                                                                                                                                                                                                                                                                                                                                                                                                                                                                                                                                                                                                                                                                                                                                                                                                                                                                                                                                  | Not applicable            |
|                                                      | Javna Agencija za Raziskovalno Dejavnost RS (P4-0432)                                                                                                                                                                                                                                                                                                                                                                                                                                                                                                                                                                                                                                                                                                                                                                                                                                                                                                                                                                                                                                                                                                                                                                                                                                                                                                                                                                                                                                                                                                                                                                                                                                                                                                                                                                                                                                                          | Assoc Prof Cene Gostinčar |
|                                                      | Javna Agencija za Raziskovalno Dejavnost RS (P1-0198)                                                                                                                                                                                                                                                                                                                                                                                                                                                                                                                                                                                                                                                                                                                                                                                                                                                                                                                                                                                                                                                                                                                                                                                                                                                                                                                                                                                                                                                                                                                                                                                                                                                                                                                                                                                                                                                          | Not applicable            |
|                                                      | Javna Agencija za Raziskovalno Dejavnost RS (J4-2549)                                                                                                                                                                                                                                                                                                                                                                                                                                                                                                                                                                                                                                                                                                                                                                                                                                                                                                                                                                                                                                                                                                                                                                                                                                                                                                                                                                                                                                                                                                                                                                                                                                                                                                                                                                                                                                                          | Assoc Prof Cene Gostinčar |
| <b>Abstract:</b>                                     | <p>The great diversity of lifestyles and survival strategies observed in fungi is reflected in the many ways in which they reproduce and recombine. Although truly asexual fungi are rare, population genomic data support the clonality of two extremotolerant black yeasts from Dothideomycetes: <i>Hortaea werneckii</i> and <i>Aureobasidium melanogenum</i>. Thus, the discovery of a number of diploid strains of these species could not be explained as the product of conventional sexual reproduction.</p> <p>Genome sequencing revealed that the ratio of diploid to haploid strains in both <i>H. werneckii</i> and <i>A. melanogenum</i> is approximately 2:1. Linkage disequilibrium between pairs of polymorphic loci and a high degree of concordance between the phylogenies of different genomic regions confirmed that both species are clonal. Heterozygosity of diploid strains is high, with several hybridizing genome pairs reaching the intergenomic distances typically seen between different fungal species. The origin of diploid strains collected worldwide can be traced to a handful of hybridization events that produced diploids, which were stable over long periods of time and distributed over large geographic areas.</p> <p>Our results, based on the genomes of over 100 strains of two black yeasts, show that although they are asexual, they occasionally form stable and highly heterozygous diploid hybrids. The mechanism of these apparently rare hybridization events, which are not followed by meiosis or haploidisation, remains unknown. Both extremotolerant yeasts, <i>H. werneckii</i> and even more so <i>A. melanogenum</i>, a close relative of the intensely recombining and biotechnologically relevant <i>Aureobasidium pullulans</i>, provide an attractive model for studying the role of clonality and ploidy in extremotolerant fungi.</p> |                           |
| <b>Corresponding Author:</b>                         | Cene Gostinčar, Ph.D.<br>University of Ljubljana Biotechnical faculty: Univerza v Ljubljani Biotehniška fakulteta Ljubljana, SLOVENIA                                                                                                                                                                                                                                                                                                                                                                                                                                                                                                                                                                                                                                                                                                                                                                                                                                                                                                                                                                                                                                                                                                                                                                                                                                                                                                                                                                                                                                                                                                                                                                                                                                                                                                                                                                          |                           |
| <b>Corresponding Author Secondary Information:</b>   |                                                                                                                                                                                                                                                                                                                                                                                                                                                                                                                                                                                                                                                                                                                                                                                                                                                                                                                                                                                                                                                                                                                                                                                                                                                                                                                                                                                                                                                                                                                                                                                                                                                                                                                                                                                                                                                                                                                |                           |
| <b>Corresponding Author's Institution:</b>           | University of Ljubljana Biotechnical faculty: Univerza v Ljubljani Biotehniška fakulteta                                                                                                                                                                                                                                                                                                                                                                                                                                                                                                                                                                                                                                                                                                                                                                                                                                                                                                                                                                                                                                                                                                                                                                                                                                                                                                                                                                                                                                                                                                                                                                                                                                                                                                                                                                                                                       |                           |
| <b>Corresponding Author's Secondary Institution:</b> |                                                                                                                                                                                                                                                                                                                                                                                                                                                                                                                                                                                                                                                                                                                                                                                                                                                                                                                                                                                                                                                                                                                                                                                                                                                                                                                                                                                                                                                                                                                                                                                                                                                                                                                                                                                                                                                                                                                |                           |
| <b>First Author:</b>                                 | Cene Gostinčar, Ph.D.                                                                                                                                                                                                                                                                                                                                                                                                                                                                                                                                                                                                                                                                                                                                                                                                                                                                                                                                                                                                                                                                                                                                                                                                                                                                                                                                                                                                                                                                                                                                                                                                                                                                                                                                                                                                                                                                                          |                           |
| <b>First Author Secondary Information:</b>           |                                                                                                                                                                                                                                                                                                                                                                                                                                                                                                                                                                                                                                                                                                                                                                                                                                                                                                                                                                                                                                                                                                                                                                                                                                                                                                                                                                                                                                                                                                                                                                                                                                                                                                                                                                                                                                                                                                                |                           |
| <b>Order of Authors:</b>                             | Cene Gostinčar, Ph.D.                                                                                                                                                                                                                                                                                                                                                                                                                                                                                                                                                                                                                                                                                                                                                                                                                                                                                                                                                                                                                                                                                                                                                                                                                                                                                                                                                                                                                                                                                                                                                                                                                                                                                                                                                                                                                                                                                          |                           |
|                                                      | Xiaohuan Sun                                                                                                                                                                                                                                                                                                                                                                                                                                                                                                                                                                                                                                                                                                                                                                                                                                                                                                                                                                                                                                                                                                                                                                                                                                                                                                                                                                                                                                                                                                                                                                                                                                                                                                                                                                                                                                                                                                   |                           |
|                                                      | Anja Černoša                                                                                                                                                                                                                                                                                                                                                                                                                                                                                                                                                                                                                                                                                                                                                                                                                                                                                                                                                                                                                                                                                                                                                                                                                                                                                                                                                                                                                                                                                                                                                                                                                                                                                                                                                                                                                                                                                                   |                           |
|                                                      |                                                                                                                                                                                                                                                                                                                                                                                                                                                                                                                                                                                                                                                                                                                                                                                                                                                                                                                                                                                                                                                                                                                                                                                                                                                                                                                                                                                                                                                                                                                                                                                                                                                                                                                                                                                                                                                                                                                |                           |

|                                                |                                                                                                                                                                                                                                                                                                                                                                                                                                                                                                                                                                                                                                                                                                                                                                                                                                                                                                                                                                                                                                                                                                                                                                                                                                                                                                                                                                                                                                                                                                                                                                                                                                                                                                                                                                                                                                                                                                                                                                                                                                                                                                                                                                                                                                                                                                                                                                                                                                                                                                                                                                                                                                                                                                                                                                                                                                                                                                                                                                                                                                                                                                                                                                                                                                                                                                                                                                                                                                                                                                                                                                                                                                                                                                                                                                                                                                                                                                                                                                                                         |
|------------------------------------------------|---------------------------------------------------------------------------------------------------------------------------------------------------------------------------------------------------------------------------------------------------------------------------------------------------------------------------------------------------------------------------------------------------------------------------------------------------------------------------------------------------------------------------------------------------------------------------------------------------------------------------------------------------------------------------------------------------------------------------------------------------------------------------------------------------------------------------------------------------------------------------------------------------------------------------------------------------------------------------------------------------------------------------------------------------------------------------------------------------------------------------------------------------------------------------------------------------------------------------------------------------------------------------------------------------------------------------------------------------------------------------------------------------------------------------------------------------------------------------------------------------------------------------------------------------------------------------------------------------------------------------------------------------------------------------------------------------------------------------------------------------------------------------------------------------------------------------------------------------------------------------------------------------------------------------------------------------------------------------------------------------------------------------------------------------------------------------------------------------------------------------------------------------------------------------------------------------------------------------------------------------------------------------------------------------------------------------------------------------------------------------------------------------------------------------------------------------------------------------------------------------------------------------------------------------------------------------------------------------------------------------------------------------------------------------------------------------------------------------------------------------------------------------------------------------------------------------------------------------------------------------------------------------------------------------------------------------------------------------------------------------------------------------------------------------------------------------------------------------------------------------------------------------------------------------------------------------------------------------------------------------------------------------------------------------------------------------------------------------------------------------------------------------------------------------------------------------------------------------------------------------------------------------------------------------------------------------------------------------------------------------------------------------------------------------------------------------------------------------------------------------------------------------------------------------------------------------------------------------------------------------------------------------------------------------------------------------------------------------------------------------------|
|                                                | Chao Fang                                                                                                                                                                                                                                                                                                                                                                                                                                                                                                                                                                                                                                                                                                                                                                                                                                                                                                                                                                                                                                                                                                                                                                                                                                                                                                                                                                                                                                                                                                                                                                                                                                                                                                                                                                                                                                                                                                                                                                                                                                                                                                                                                                                                                                                                                                                                                                                                                                                                                                                                                                                                                                                                                                                                                                                                                                                                                                                                                                                                                                                                                                                                                                                                                                                                                                                                                                                                                                                                                                                                                                                                                                                                                                                                                                                                                                                                                                                                                                                               |
|                                                | Nina Gunde-Cimerman                                                                                                                                                                                                                                                                                                                                                                                                                                                                                                                                                                                                                                                                                                                                                                                                                                                                                                                                                                                                                                                                                                                                                                                                                                                                                                                                                                                                                                                                                                                                                                                                                                                                                                                                                                                                                                                                                                                                                                                                                                                                                                                                                                                                                                                                                                                                                                                                                                                                                                                                                                                                                                                                                                                                                                                                                                                                                                                                                                                                                                                                                                                                                                                                                                                                                                                                                                                                                                                                                                                                                                                                                                                                                                                                                                                                                                                                                                                                                                                     |
|                                                | Zewei Song                                                                                                                                                                                                                                                                                                                                                                                                                                                                                                                                                                                                                                                                                                                                                                                                                                                                                                                                                                                                                                                                                                                                                                                                                                                                                                                                                                                                                                                                                                                                                                                                                                                                                                                                                                                                                                                                                                                                                                                                                                                                                                                                                                                                                                                                                                                                                                                                                                                                                                                                                                                                                                                                                                                                                                                                                                                                                                                                                                                                                                                                                                                                                                                                                                                                                                                                                                                                                                                                                                                                                                                                                                                                                                                                                                                                                                                                                                                                                                                              |
| <b>Order of Authors Secondary Information:</b> |                                                                                                                                                                                                                                                                                                                                                                                                                                                                                                                                                                                                                                                                                                                                                                                                                                                                                                                                                                                                                                                                                                                                                                                                                                                                                                                                                                                                                                                                                                                                                                                                                                                                                                                                                                                                                                                                                                                                                                                                                                                                                                                                                                                                                                                                                                                                                                                                                                                                                                                                                                                                                                                                                                                                                                                                                                                                                                                                                                                                                                                                                                                                                                                                                                                                                                                                                                                                                                                                                                                                                                                                                                                                                                                                                                                                                                                                                                                                                                                                         |
| <b>Response to Reviewers:</b>                  | <p>We would like to thank the reviewers for their detailed and constructive feedback! Both reviewers requested revisions, which have now been made. The detailed responses to the comments of the reviewers are listed below. We believe this strengthens the manuscript and we hope you can consider it for publication.</p> <p>Reviewer #1</p> <p>Comment: separate trees were generated for "longest alignments" and I think this approach can hide potential admixture events. It is not reported anywhere what are the average lengths of these alignments, but the point is that if admixture concerns a small part of the chromosome, the alignment of the whole chromosome will not detect those admixture events. I would suggest to split all alignments into portions of equal length or of equal number of informative SNPs, to identify potential admixture events, if any exist.</p> <p>Answer: The range of lengths of the alignments is now reported in the methodology: "lengths of 1364 bp to 5089 bp for <i>H. werneckii</i> and 3400 bp to 13257 bp for <i>A. melanogenum</i>". The length of these alignments was not overwhelming, therefore the masking of the admixture events was not explicitly addressed in the initial manuscript – they should be able to reflect also admixture events concerning only small parts of the chromosome. If the alignments were split further, the number of phylogenetically informative sites in them would be limited. The divergence of the genomes and likely also the difficult assembly of diploid genomes precluded the recovery of longer alignments with a 100% representation of all haploid genomes. However, as an alternative to the alignment-splitting approach, phylogenetic trees were also constructed from core BUSCOs that were found in all genomes of each species (and in the number of copies corresponding to the ploidy of the genome). Since the number of genomes was considerable and since an unexpected copy number in even a single genome excluded the gene from the analysis, the final dataset was fairly modest. Alignments longer than 200 nucleotides and with an average of at least 15 nucleotide differences between gene pairs were used for phylogeny reconstruction, producing 22 phylogenetic trees in case of <i>H. werneckii</i> and 44 in case of <i>A. melanogenum</i>. While these phylogenies are generally based on shorter alignments and are perhaps less reliable (which was the reason for reporting Sibelia and not BUSCO alignments in the manuscript), they result in almost identical topology and the proportion of trees supporting the major splits are very similar. Please see the here provided phylogeny with percentages to the right of trees marking the proportion of trees supporting the major clusters. Black percentage points are now reported in the revised Fig. 3 (in response to the comment below; calculated from phylogenies based on genomic alignments produced by Sibelia). Red numbers are the percentages of trees supporting the same clusters in trees produced from alignment of BUSCOs (provided here for review purposes only).<br/>[please refer to the attached file Answers.to.reviewers.REVIEW.ONLY.docx for the image]</p> <p>Comment: tree discordancies are not quantified in any way and from figure 3 it's hard to judge how much concordance there is. If the species cluster in several groups one could show how many topologies (proportion) of these major clusters are consistent with each other and how many are different</p> <p>Answer: The proportion of phylogenies supporting the major clusters have now been labelled in panels A and B of Fig. 3 as suggested. The figure legend has been amended accordingly.</p> <p>Minor comments:<br/>Comment: Table S1 and Table 1: Please explain in the legend what distributions are showing. Also it would be helpful to include a column in the tables with information</p> |

about ploidy.

Answer: The legend of Table S1 (which shows the distributions) has been amended to explain the plots in more detail. The column reporting the ploidy has been added as suggested to Table 1 and Table S1. Additionally, the ploidy column has been also added to Table 2 to keep the format of tables consistent.

Comment: line 183: I'm not sure what the authors mean by 'consistent' in this sentence. Wasn't the ploidy decided from genome assembly characteristics? In this case it's expected to be consistent.

Answer: This was an awkwardly written sentence – we did not want to say that the genomic characteristics were consistent with ploidy (which they were, because this is how the ploidy was determined, as correctly pointed out by the reviewer), but that haploid strains were very similar in their characteristics to each other, and the same was true for diploid strains. We rewrote the sentence as follows and hopefully this makes the message clearer: “The distribution of assembly size, number of predicted genes and other genomic characteristics within both haploid and diploid *H. werneckii* groups was narrow (Table 3).”.

Comment: line 195: I would suggest explaining here in once sentence how SNP calling was made, especially how the reference was constructed, because it's quite important for interpreting the results.

Answer: We added a short description, as suggested: “Single-nucleotide polymorphisms (SNPs) were determined with Genome Analysis Toolkit after mapping the sequencing reads to reference genomes (haploidised genome of diploid strain EXF-2000 in case of *H. werneckii*, whole genome of haploid strain EXF-3378 in case of *A. melanogenum*).” We hope this is sufficiently detailed for the Results section, since a more detailed description is provided in the Methods.

Comment: line 202: PCA plots in Fig1: It would be useful to add ploidy information in the plot to see where are those samples located relative to haploids. Are these clusters explained by geography or habitat? Perhaps adding this information would be useful as well. It is also not mentioned anywhere how divergent are these clusters. It would be worth reporting nucleotide divergence between (haploid) genomic groups.

Answer: Diploid strains have now been marked with bold labels in all panels of Fig. 1 – PCA plots as suggested, but also in phylogenetic networks. The sizes and placement of labels have been optimized to increase legibility. The clusters can indeed be partially explained by geography/habitat – these information are visualised in Fig. 4 and discussed there as well. This decision was made after we first attempted to show the geography/habitat data in Fig. 1 (PCA plots) and discovered that the number of genomes and their considerable overlapping make an efficient visualisation all but impossible. Divergence between clusters is now also marked in Fig. 1 with dashed lines marking the groups of haploid strains and distance in millions of SNPs between groups. The legend of the figure has been amended to reflect these changes.

Comment: line 221: Please highlight haploids/diploid on the phylogeny.

Answer: In Fig. 3, ploidy has now been marked on the phylogeny – diploid strain names have been written in bold in panels C and D. In panels A and B diploid (and tetraploid) strains were already marked with letters added to strain names – this has now been explicitly explained in the legend as well.

Comment: line 209: Considering LD decay analysis it looks to me that  $r^2$  is very low even between close variants. In general, it is not clear from the figure 2 what is the maximum  $r^2$  between adjacent pairs of SNPs (start of the line) and what is the distance over which  $r^2$  falls by half. I think the authors should give some quantification of this in the results. This could give a better understanding of the LD.

Answer: The maximum value of LD (drawn as the upper red horizontal line on the LD charts) are now also reported in the Results, as suggested: “Plotting  $r^2$  as a function of the distance between pairs of loci showed very little decay of linkage disequilibrium in either species from the maximum initial values of 0.17 for *H. werneckii* and 0.22 for *A. melanogenum*.”. Regarding the low values, the initial  $r^2$  value is not only dependent on the disequilibrium, but also on the allele frequency (i.e. alleles in less than 50% frequency that are in total disequilibrium, will have  $r^2$  not 1 but less than 1) and is therefore not unusual.

Comment: line 229: This is a really interesting way to show relationships between hybrids!

Answer: Thank you!

Comment: line 250: Fig 5, What are colours in the legend signifying?

Answer: The sentence explaining the colours was lost in revision and was now again added: “Colours of strain names in the legend mark haploid (blue) and diploid (red)

genomes.” Thank you for alerting us to this!

Comment: line 282: MAT loci: One option to make sure if MAT loci is truly absent would be to look for reads matching the sequence of MAT. This could eliminate the possibility that the quality of an assembly is a source of missing loci.

Answer: The original manuscript already acknowledged the possibility that the apparently missing loci are the consequence of the assembly problems and not of their true absence. We now performed an additional analysis, as suggested. In many cases this was not helpful because the divergence of some loci is so large, that it resulted in gaps in the sequencing coverage even in cases where the putative mating-type loci were found in the assembly. In other cases, especially in *A. melanogenum*, the coverage did indeed suggest, as the reviewer thought it might, that the loci are actually present in the genome, but not present in the genome assembly. The results of the sequencing coverage analysis have been added to Supplementary Figs. 4 and 5 and the corresponding figure legends amended as appropriate. The corresponding Results section of the manuscript has been changed as follows: “While mapping of sequencing reads of some strains to the reference mating-type locus of each species contained gaps due to high divergence of the locus, in some other strains the sequencing coverage indicated the presence of the locus despite its absence in the whole-genome assembly (Supplemental Figs. S4, S5). The poor assembly of the locus was particularly problematic in diploid genomes and even more so in the tetraploid genome of *H. werneckii*, precluding a conclusive analysis in all strains. The absence of the locus in some strains should at this point in time not be seen as a conclusive result.” Our opinion on this is that the sequencing coverage analysis comes with its own set of problems, but its inclusion does indeed provide a more complete picture of a complex situation. While a more conclusive resolution of this question can only be provided by using a sequencing technology producing longer reads, the results presented in this manuscript, while partial, do provide relevant information tightly linked to the main topic of the manuscript as well as important indications for future research, at the same time acknowledging the partiality of the results.

Comment: line 263: In the figures S4 and S5 one information that is missing is whether the same MAT type is present always on the same genomic background, assuming that these different types are in the same locus. Examples of MAT introgression are common in fungi so it would be nice to check if something like this occurs in these species.

Answer: We agree that this is an interesting question and we did some preliminary investigation into it before preparing the manuscript. However, due to the above discussed suboptimal assembly in the mating-type loci, this was only possible for some strains. Additionally, the precise borders of the mating locus in *H. werneckii* are not known. Based on all of this we decided not to report highly uncertain data and rather leave this question to be solved by a more targeted experiment, e.g. by using a sequencing technology producing long reads.

Comment: line 619: In the description of processing sequence alignments, please specify what do you mean by “long gaps”? Was there any threshold?

Answer: This was indeed not as precise as it should be. We replaced “long gaps” with “with more than 15% gaps over the whole alignment length in any of the sequences of *H. werneckii* or 25% in case of *A. melanogenum*”.

Reviewer #2

Major:

Comment: The methods are missing a description of how ploidy was estimated, the results of which are integral to the conclusions.

Answer: Thank you for pointing this out. To correct this omission, the methods have been amended with the following paragraph: “The ploidy of the genomes was determined based on the following criteria for both species: haploids had a genome size smaller than 31 Mbp, number of predicted genes smaller than 13 000 and the average copy number of core BUSCOs (those present in all strains of the species) lower than 1.1. Diploid strains had a genome size larger than 46 Mbp, number of predicted genes greater than 18 000 and the average copy number of core BUSCOs greater than 1.5. The ploidy of genomes with any of the criteria between the above thresholds was labelled as “unclear” (Table 2).”.

|  |                                                                                                                                                                                                                                                                                                                                                                                                                                                                                                                                                                                                                                                                                                                                                                                                                                                                                                                                                                                                                                                                                                                                                                                                                                                                                                                                                                                                                                                                                                                                                                                                                                                                                                                                                                                                                                                                                                                                                                                                                                                                                                                                                                                                                                                                                                                            |
|--|----------------------------------------------------------------------------------------------------------------------------------------------------------------------------------------------------------------------------------------------------------------------------------------------------------------------------------------------------------------------------------------------------------------------------------------------------------------------------------------------------------------------------------------------------------------------------------------------------------------------------------------------------------------------------------------------------------------------------------------------------------------------------------------------------------------------------------------------------------------------------------------------------------------------------------------------------------------------------------------------------------------------------------------------------------------------------------------------------------------------------------------------------------------------------------------------------------------------------------------------------------------------------------------------------------------------------------------------------------------------------------------------------------------------------------------------------------------------------------------------------------------------------------------------------------------------------------------------------------------------------------------------------------------------------------------------------------------------------------------------------------------------------------------------------------------------------------------------------------------------------------------------------------------------------------------------------------------------------------------------------------------------------------------------------------------------------------------------------------------------------------------------------------------------------------------------------------------------------------------------------------------------------------------------------------------------------|
|  | <p>Comment: The authors should be clearer about how they use and what they mean by clonality and asexuality particularly with respect to recombination.<br/> Answer: We carefully re-read the manuscript to make the use of terminology unambiguous. We use the term “asexuality” sparsely and only in the introduction, when referencing to the works of other authors, which wrote about asexuality in the sense of the absence of conventional sexual reproduction in fungi. In other parts of the manuscript we use the term “clonality” – reproduction, which produces clonal offspring. While the absence of sexual reproduction still allows for recombination (e.g. through parasexuality), the term clonality implies the absence of recombination altogether – something that is supported by genomic data for both <i>H. werneckii</i> and <i>A. melanogenum</i> (with the exception of intraspecific hybrids). We also added the short definition of clonality in the beginning of the introduction to indicate how the term is used in the manuscript: “Among the most diverse are fungi, which exhibit a wide range of strategies, from strictly clonal species, which do not recombine at all [1], to species with thousands of mating types [2].” We hope this provides the requested clarity.</p> <p>Minor:<br/> Comment: The use of the term 'hybrid' should be preceded by the descriptor 'intraspecific' for clarity's sake<br/> Answer: We have added the descriptor “interspecific” to the manuscript, as suggested.<br/> Comment: A clearer description of the question/hypotheses being addressed earlier in the introduction would go a long way to improve readability.<br/> Answer: As suggested, the hypothesis has now been briefly introduced at the end of the second paragraph of the Introduction: “Yet some species appear to be strictly clonal, even by highly sensitive measures of recombination used by population genomics, such as linkage disequilibrium [1,8]. This study focuses on two species of such strictly clonal fungi. The analysis of 115 genomes of haploid and diploid wild strains is used to test the hypothesis that even clonal phylogenetic lineages can generate diversity through hybridization that produces highly heterozygous and stable diploids.”.</p> |
|--|----------------------------------------------------------------------------------------------------------------------------------------------------------------------------------------------------------------------------------------------------------------------------------------------------------------------------------------------------------------------------------------------------------------------------------------------------------------------------------------------------------------------------------------------------------------------------------------------------------------------------------------------------------------------------------------------------------------------------------------------------------------------------------------------------------------------------------------------------------------------------------------------------------------------------------------------------------------------------------------------------------------------------------------------------------------------------------------------------------------------------------------------------------------------------------------------------------------------------------------------------------------------------------------------------------------------------------------------------------------------------------------------------------------------------------------------------------------------------------------------------------------------------------------------------------------------------------------------------------------------------------------------------------------------------------------------------------------------------------------------------------------------------------------------------------------------------------------------------------------------------------------------------------------------------------------------------------------------------------------------------------------------------------------------------------------------------------------------------------------------------------------------------------------------------------------------------------------------------------------------------------------------------------------------------------------------------|

|                                                                                                                                                                                                                                                                                                                                                                                                                                    |                 |
|------------------------------------------------------------------------------------------------------------------------------------------------------------------------------------------------------------------------------------------------------------------------------------------------------------------------------------------------------------------------------------------------------------------------------------|-----------------|
| <b>Additional Information:</b>                                                                                                                                                                                                                                                                                                                                                                                                     |                 |
| <b>Question</b>                                                                                                                                                                                                                                                                                                                                                                                                                    | <b>Response</b> |
| Are you submitting this manuscript to a special series or article collection?                                                                                                                                                                                                                                                                                                                                                      | No              |
| <p><b>Experimental design and statistics</b></p> <p>Full details of the experimental design and statistical methods used should be given in the Methods section, as detailed in our <a href="#">Minimum Standards Reporting Checklist</a>. Information essential to interpreting the data presented should be made available in the figure legends.</p> <p>Have you included all the information requested in your manuscript?</p> | Yes             |
| <p><b>Resources</b></p> <p>A description of all resources used, including antibodies, cell lines, animals and software tools, with enough</p>                                                                                                                                                                                                                                                                                      | Yes             |

|                                                                                                                                                                                                                                                                                                                                                                                                                                                                                                                                                         |            |
|---------------------------------------------------------------------------------------------------------------------------------------------------------------------------------------------------------------------------------------------------------------------------------------------------------------------------------------------------------------------------------------------------------------------------------------------------------------------------------------------------------------------------------------------------------|------------|
| <p>information to allow them to be uniquely identified, should be included in the Methods section. Authors are strongly encouraged to cite <a href="#">Research Resource Identifiers</a> (RRIDs) for antibodies, model organisms and tools, where possible.</p> <p>Have you included the information requested as detailed in our <a href="#">Minimum Standards Reporting Checklist</a>?</p>                                                                                                                                                            |            |
| <p><b>Availability of data and materials</b></p> <p>All datasets and code on which the conclusions of the paper rely must be either included in your submission or deposited in <a href="#">publicly available repositories</a> (where available and ethically appropriate), referencing such data using a unique identifier in the references and in the “Availability of Data and Materials” section of your manuscript.</p> <p>Have you have met the above requirement as detailed in our <a href="#">Minimum Standards Reporting Checklist</a>?</p> | <p>Yes</p> |

# 1 **Clonality, inbreeding, and hybridization in two extremotolerant black yeasts**

2

3 Cene Gostinčar <sup>a,b,¶,\*</sup>, Xiaohuan Sun <sup>c,¶</sup>, Anja Černoša <sup>a</sup>, Chao Fang <sup>c</sup>, Nina Gunde-  
4 Cimerman <sup>a,+</sup>, Zewei Song <sup>c,+</sup>

5

6 <sup>a</sup> Department of Biology, Biotechnical Faculty, University of Ljubljana, 1000 Ljubljana,  
7 Slovenia

8 <sup>b</sup> Lars Bolund Institute of Regenerative Medicine, BGI-Qingdao, Qingdao 266555,  
9 China

10 <sup>c</sup> BGI-Shenzhen, Beishan Industrial Zone, Shenzhen 518083, China

11

12 ¶¶ *These authors contributed equally to this work as first authors.*

13 + *These authors contributed equally to this work as senior authors.*+

14

15 ORCID iDs: Cene Gostinčar [0000-0002-0149-3674]; Xiaohuan Sun [0000-0002-3411-  
16 5995]; Anja Černoša []; Chao Fang [0000-0002-6830-3337]; Nina Gunde-Cimerman  
17 [0000-0002-9464-3263]; Zewei Song [0000-0002-0606-6946];

18

19 \* **Corresponding author: Cene Gostinčar**

20 Department of Biology, Biotechnical Faculty

21 University of Ljubljana

22 Jamnikarjeva 101

23 SI-1000 Ljubljana

24 Slovenia

25 Tel.: +386-1-320 3392

26 Fax: +386-1-2573390

27 E-mail: [cene.gostincar@bf.uni-lj.si](mailto:cene.gostincar@bf.uni-lj.si), [cgostincar@gmail.com](mailto:cgostincar@gmail.com)

28

29 Xiaohuan Sun: [sunxiaohuan@genomics.cn](mailto:sunxiaohuan@genomics.cn)

30 Anja Černoša: [anja.cernosa@bf.uni-lj.si](mailto:anja.cernosa@bf.uni-lj.si)

31 Chao Fang: [fangchao@genomics.cn](mailto:fangchao@genomics.cn)

32 Nina Gunde-Cimerman: [nina.Gunde-Cimerman@bf.uni-lj.si](mailto:nina.Gunde-Cimerman@bf.uni-lj.si)

33 Zewei Song: [songzewei@genomics.cn](mailto:songzewei@genomics.cn)

34

35 **Running Title**

36 *Hybridization in extremotolerant yeasts*

37

38

39 **Abstract**

40 **Background**

41 The great diversity of lifestyles and survival strategies observed in fungi is reflected in  
42 the many ways in which they reproduce and recombine. Although a complete absence  
43 of recombination is rare, it has been reported for some species, among them two  
44 extremotolerant black yeasts from Dothideomycetes: *Hortaea werneckii* and  
45 *Aureobasidium melanogenum*. Therefore, the presence of diploid strains in these  
46 species cannot be explained as the product of conventional sexual reproduction.

47 **Results**

48 Genome sequencing revealed that the ratio of diploid to haploid strains in both *H.*  
49 *werneckii* and *A. melanogenum* is about 2:1. Linkage disequilibrium between pairs of  
50 polymorphic loci and a high degree of concordance between the phylogenies of  
51 different genomic regions confirmed that both species are clonal. Heterozygosity of  
52 diploid strains is high, with several hybridizing genome pairs reaching the intergenomic  
53 distances typically seen between different fungal species. The origin of diploid strains  
54 collected worldwide can be traced to a handful of hybridization events that produced  
55 diploids, which were stable over long periods of time and distributed over large  
56 geographic areas.

57 **Conclusions**

58 Our results, based on the genomes of over 100 strains of two black yeasts, show that  
59 although they are clonal, they occasionally form stable and highly heterozygous diploid  
60 intraspecific hybrids. The mechanism of these apparently rare hybridization events,  
61 which are not followed by meiosis or haploidisation, remains unknown.

62 Both extremotolerant yeasts, *H. werneckii* and even more so *A. melanogenum*, a close  
63 relative of the intensely recombining and biotechnologically relevant *Aureobasidium*  
64 *pullulans*, provide an attractive model for studying the role of clonality and ploidy in  
65 extremotolerant fungi.

66

67 Keywords: population genomics, halotolerance, extremotolerance, halophilic fungus,  
68 *Hortaea werneckii*, *Aureobasidium melanogenum*, hybridization

69



## 70 **Introduction**

71 No single reproductive strategy is optimal for all species and all conditions in which  
72 they live. This results in the coexistence of a wide variety of ways in which organisms  
73 reproduce and recombine their genetic material. Among the most diverse are fungi,  
74 which exhibit a wide range of strategies, from strictly clonal species, which do not  
75 recombine at all [1], to species with thousands of mating types [2]. Sexual, parasexual,  
76 and clonal reproduction are broad categories that encompass a variety of different  
77 phenomena, processes, and mechanisms, some of which are typical of larger groups  
78 (e.g., the dikaryon of basidiomycetes), while others differ even among closely related  
79 species [3].

80 Traditionally, up to one-fifth of fungi were thought to be asexual [4]. Subsequent genetic  
81 and genomic analyses found at least a rudimentary mating-type locus in nearly every  
82 species studied. Population genetics showed that most species previously thought to  
83 be asexual are actually recombining [5–7]. However, in most species, asexual  
84 reproduction dominates over occasional recombination. To account for the observation  
85 that some apparently clonal species can nevertheless recombine at levels low enough  
86 not to break the pattern of population structure typical of clonal species, Tibayrenc and  
87 Ayala [5] introduced the concept of “restricted recombination”. Yet some species  
88 appear to be strictly clonal, even by highly sensitive measures of recombination used  
89 by population genomics, such as linkage disequilibrium [1,8]. This study focuses on  
90 two species of such strictly clonal fungi. The analysis of 115 genomes of haploid and  
91 diploid wild strains of these species is used to test the hypothesis that even clonal  
92 phylogenetic lineages can generate diversity through hybridization that produces  
93 highly heterozygous and stable diploids.

94 Several reasons for the pervasive clonality in fungi have been proposed, such as hybrid  
95 incompatibility or limited opportunities to meet strains of the opposite mating type [6].  
96 Severe bottlenecks (e.g., following the introduction of a small number of strains to a  
97 new site) can lead to a skewed balance of mating types. Strains of pathogens with  
98 host-to-host transmission may encounter other strains of the species very rarely [6,9].  
99 Similar may be true for fungi with poor dispersal abilities that are restricted to rare and  
100 isolated ecological islands, such as certain extreme environments [1,10]. However,  
101 even without these constraints, sexually meiotic reproductive events are often majorly  
102 outweighed by asexual mitotic events, as shown in *Saccharomyces paradoxus* [11].

103 The absence of recombination carries the risk of accumulation of deleterious  
104 mutations, a process known as Muller's ratchet. Sexual reproduction remedies this and  
105 efficiently generates diversity, which is a substrate for selection and adaptation to novel  
106 conditions. But asexual reproduction has its own advantages. For example, it can  
107 conserve energy by eliminating the need to maintain the mating system and form  
108 sexual structures [12,13]. It also allows the organism to faithfully reproduce successful  
109 genomic configurations and thus avoid the recombination load, a loss of fitness due to  
110 a break up of advantageous combinations of interacting alleles [13–15]. This may be  
111 particularly beneficial in specialists, such as those inhabiting extreme environments  
112 [15,16].

113 In addition to sexual reproduction, fungi can employ another tool to recombine their  
114 genomes: parasexuality [17]. Two cells can fuse to combine their genetic material,  
115 providing the opportunity for mitotic recombination. Haploid parents thus produce  
116 diploid offspring, but this ploidy change is generally considered unstable. However, it  
117 does not revert to the original ploidy of the parental strains through the tightly controlled  
118 and high-fidelity process of meiosis. Instead, chromosomes are lost randomly through  
119 a series of aneuploid generations. The importance of parasexuality outside of  
120 laboratory settings has been questioned [18], but in at least some cases the process  
121 appears to drive adaptation and facilitate survival, e.g., in *Aspergillus fumigatus* in the  
122 lungs of patients with cystic fibrosis [19].

123 Changes in ploidy itself may be a form of adaptation, either through parasexuality or  
124 other processes such as abnormal cell division [20]. Both polyploidy and aneuploidy  
125 can be a response to adverse or novel environmental conditions [21–23]. They  
126 influence fitness through changes in cell size and shape, changes in the transcriptome  
127 (by altering gene dosage) and in the rate of adaptation, but also by providing new  
128 options for repairing DNA damage and temporarily masking deleterious mutations [20–  
129 22,24]. A growing body of evidence shows that variation in ploidy is a widespread  
130 transient adaptation of fungi to novel conditions (reviewed by Naranjo–Ortiz and  
131 Gabaldón [22]). Aneuploidies are more common and more easily reversed than  
132 tandem gene duplications, which are an alternative way to increase gene dosage.  
133 During cultivation under optimal conditions, such altered ploidies tend to revert to a  
134 baseline ploidy of the species, often without clear increases in fitness [21,25].

135 Sexual and parasexual recombination can lead to recombinant lineages and  
136 interspecific hybrids [26], another process increasingly recognised as an important  
137 generator of fungal diversity, including in industrial and clinical settings (reviewed by  
138 Naranjo–Ortiz and Gabaldón [22]). With the increasing accessibility of genome  
139 sequencing, research on this topic is rapidly expanding to non-model species. Some  
140 hybrids exhibit higher fitness than their parental strains [27], making hybridization an  
141 important driver of adaptation to novel environments [22,28]. Divergent hybrid  
142 genomes can be stabilised by chromosomal aberrations [29,30] and the outcome of  
143 hybridization is often similar to parasexuality. Hybrids of *Cryptococcus neoformans* and  
144 *Cryptococcus gattii*, for example, rapidly lose chromosomes and rearrange them  
145 [29,30].

146 Indications of (intraspecific) hybridization were also reported by Gostinčar et al. [1] in  
147 the extremely halotolerant black yeast *Hortaea werneckii* (Capnodiales,  
148 Dothideomycetidae, Dothideomycetes, Pezizomycotina, Ascomycota), a globally  
149 distributed species specialised for survival in saline environments and able to grow in  
150 nearly salt-saturated solutions [31,32]. Whole genome sequencing of twelve strains  
151 indicated that the species is clonal, but also that a majority of the strains are highly  
152 heterozygous diploids. These diploids appeared to be stable enough to spread over  
153 considerable distances, with little evidence of haploidisation [1,33]. This explained the  
154 ploidy of the reference genome, which was originally interpreted as the result of  
155 endoreduplication [34,35]. Subsequent genome sequencing of two additional *H.*  
156 *werneckii* strains provided additional support for the hybridization hypothesis [36].  
157 However, the total number of sequenced *H. werneckii* genomes remained low, limiting  
158 the power of the analyses and the interpretation of the results.

159 A similar pattern of haploid and diploid strains coexisting within an apparently clonal  
160 species has since been discovered in *Aureobasidium melanogenum* (Dothideales,  
161 Dothideomycetidae, Dothideomycetes, Pezizomycotina, Ascomycota), another black  
162 yeast only distantly related to *H. werneckii* [8]. While *A. melanogenum* tolerates less  
163 extreme conditions than *H. werneckii*, it is tolerant of a wider range of types of stress  
164 and occurs in a variety of environments, from hypersaline waters to various indoor  
165 habitats (reviewed by Černoša et al. [8]).

166 The role of hybridization and ploidy changes are among the overlooked dimensions of  
167 fungal genetics [22]. Here we analyse 66 genomes of *H. werneckii* and 49 genomes of

168 *A. melanogenum* to provide insight into the reproductive strategy of these two  
169 extremotolerant fungi, characterised by coexistence of haploid and highly  
170 heterozygous diploid strains that are stable over large geographic and temporal  
171 distances.

172

## 173 **Results**

174 Whole genomes of 54 strains of the extremely halotolerant black yeast *H. werneckii*  
175 were sequenced. Combined with previously sequenced strains [1,35], this resulted in  
176 a data set of 66 whole-genome sequences (Table 1, Supplemental Table S1). A  
177 majority of strains (26) were isolated from brine, evaporation-concentrated seawater  
178 during salt extraction; followed by strains isolated from bittern (7), a saturated,  
179 magnesium-rich solution that remains after precipitation of halite during salt extraction.  
180 Nine strains were isolated from a seacoast cave in Atacama, where some of the strains  
181 grew on spider webs along with the alga *Dunaliella atacamensis* [37]. Twelve strains  
182 were isolated from marine habitats and four were clinical isolates. All genomes of *A.*  
183 *melanogenum* (Table 2) were sequenced and described in a previous study [8]. The  
184 largest number of strains (19) were isolated from bathroom and kitchen surfaces  
185 (including from kitchen appliances), followed by 16 strains from tap water or springs of  
186 tap water. In the case of both *H. werneckii* and *A. melanogenum*, the majority of strains  
187 were isolated in Slovenia.

188 Based on previous studies [1,34,35], the haploid genomes of both *H. werneckii* and *A.*  
189 *melanogenum* are approximately 25 Mbp in size. Comparing the sizes of genome  
190 assembly and the number of predicted genes in each genome, 20 (30%) *H. werneckii*  
191 genomes were recognised as haploid, 45 (68%) as diploid, and one genome as  
192 tetraploid. This was similar to the *A. melanogenum* genomes where 16 (33%) genomes  
193 were recognised as haploid, 30 (61%) as diploid, and the ploidy of three genomes (2,  
194 18, 38) was unclear [8].

195 The distribution of assembly size, number of predicted genes and other genomic  
196 characteristics within both haploid and diploid *H. werneckii* groups was narrow (Table  
197 3). The average genome assembly size was 26.52 Mbp ( $\pm 1.47$  SD) for haploid and  
198 49.30 Mbp ( $\pm 1.74$  SD) for diploid genomes. The average number of predicted genes  
199 was 9519 ( $\pm 665$  SD) for haploids and 20417 ( $\pm 1709$  SD) for diploids. As expected, the

200 quality of assembly was much lower in diploid strains, as evidenced by a higher number  
201 of contigs and a smaller N50 value, presumably due to regions of high similarity  
202 between the two haploid subgenomes, a long-standing challenge in sequencing *H.*  
203 *verneckii* genomes [35]. Nevertheless, the assembly and annotation of all strains were  
204 of reasonable quality, with only about 3.19% ( $\pm 0.30$  SD) Benchmarking Universal  
205 Single-Copy Orthologs missing completely in the haploid genomes and 6.09% ( $\pm 4.24$   
206 SD) in the diploid genomes.

207 Single-nucleotide polymorphisms (SNPs) were determined with Genome Analysis  
208 Toolkit after mapping the sequencing reads to reference genomes (haploidised  
209 genome of diploid strain EXF-2000 in case of *H. verneckii*, whole genome of haploid  
210 strain EXF-3378 in case of *A. melanogenum*). SNP analysis was performed on all  
211 strains except *H. verneckii* strain 36 due to its tetraploid genome. The average density  
212 of single nucleotide polymorphisms (SNPs) in haploid strains of *H. verneckii* was high:  
213 4.04% ( $\pm 1.11$  SD) (Table 3). For diploids, the SNP density was 3.44% ( $\pm 1.12$  SD), of  
214 which 71% of the loci were heterozygous. In *A. melanogenum* the average SNP density  
215 was 4.41% ( $\pm 1.87$  SD) in haploids and 3.79% ( $\pm 0.21$  SD) in diploids, with 44% of the  
216 latter heterozygous. Based on the SNP data, the genomes of both *H. verneckii* and *A.*  
217 *melanogenum* were clustered into 5 clusters in principal component analysis, with the  
218 first two principal components explaining 57.2% of the SNP diversity of *H. verneckii*  
219 and 59.3% of *A. melanogenum* (Fig. 1). SNP-based phylogenetic analyses of both  
220 species revealed considerable reticulation (Fig. 1). The largest cluster of strains  
221 identified by both network analysis and PCA contained 18 strains in *H. verneckii* and  
222 20 strains in *A. melanogenum*.

223 The squared correlation coefficient ( $r^2$ ) was calculated for all pairs of biallelic SNP loci  
224 present in at least two genomes analysed and within 10 kbp of each other. Plotting  $r^2$   
225 as a function of the distance between pairs of loci showed very little decay of linkage  
226 disequilibrium in either species from the maximum initial values of 0.17 for *H. verneckii*  
227 and 0.22 for *A. melanogenum*. Linkage disequilibrium remained high above half of the  
228 maximum value even for alleles that were 10 kbp apart (Fig. 2). Such strong linkage  
229 between loci can be explained by a lack of recombination that would break the linkage,  
230 confirming previous reports that *H. verneckii* and *A. melanogenum* are strictly clonal  
231 [1,8].

232 The phylogenies of the fifty longest alignable genomic regions were also consistent  
233 with the presumed lack of recombination within *H. werneckii* and *A. melanogenum*.  
234 The phylogenetic trees showed a high degree of concordance (Fig. 3), meeting the  
235 “strong phylogenetic signal” criterion for clonality [5]. Sequences representing different  
236 haploid subgenomes of diploid strains were positioned in different parts of the  
237 phylogeny, corresponding to the high heterozygosity of the strains. An extreme case  
238 of this was the tetraploid *H. werneckii* strain 36, which was positioned in four different  
239 parts of the phylogeny. When all 50 multi-labelled trees for each species were  
240 collapsed into a consensus supernetwork (Fig. 3), the result was similar to the  
241 phylogenetic network estimated from SNP data (Fig. 1).

242 The topology of the consensus phylogenies and supernetworks was best explained by  
243 a number of intraspecific hybridization events in each species: 9 or 10 events in the  
244 case of *H. werneckii* (with an additional event leading to tetraploid strain 36) and 7  
245 events in the case of *A. melanogenum* (Fig. 4). Several phylogenetic lineages resulting  
246 from these events appeared to be relatively widespread – more than one  
247 representative strain was found for most lineages, often in different habitats and  
248 geographic locations. However, lineage composition was skewed in favour of specific  
249 localities or habitats. This was confirmed by Fisher’s Exact Test, which found  
250 significant differences between groups in both the isolation habitat and the geographic  
251 location of origin for both species (“*H. werneckii* – habitats”:  $p < 0.01$ ; all other:  $p <$   
252  $0.001$ ). For example, for both species, the two largest groups (groups 1 in Fig. 4)  
253 contained isolates from Europe, with only one exception. In terms of habitats, *H.*  
254 *werneckii* group 1 was isolated mainly from hypersaline habitats and group 9 from  
255 seawater; groups 4 and 5 were found mainly in a cave on a desert coast. The largest  
256 group of haploid strains was also found mainly in hypersaline habitats. Clinical isolates  
257 of *H. werneckii* belonged to different phylogenetic lineages. The tetraploid *H. werneckii*  
258 strain 36 was isolated from the deep sea (Figs. 3, 4) and most likely arose by  
259 hybridization between diploid hybrids of groups 1 and 9. In the case of *A.*  
260 *melanogenum*, most strains originated in Europe. Some groups showed preference for  
261 particular habitats: *A. melanogenum* group 1 was mostly isolated from tap water and  
262 its sources, while the majority of isolates from household surfaces were classified into  
263 other groups.

264 Aneuploidy in the genomes of *H. werneckii* and *A. melanogenum* was investigated by  
265 searching for large genome segments with different sequencing coverage than the rest  
266 of the genome. Evidence of aneuploidy was found in 23 genomes of *H. werneckii* (35%)  
267 and 8 genomes of *A. melanogenum* (16%) (Fig. 5, Supplemental Figs. S1, S2). The  
268 majority of these genomes were diploid: 18 (78%) in the case of *H. werneckii* and 8  
269 (100%) in the case of *A. melanogenum*. Some parts of the genome were aneuploid in  
270 several strains, with most aneuploid parts representing an increase in ploidy rather  
271 than a decrease. The aneuploid strains included three of four clinical *H. werneckii*  
272 isolates and the only clinical isolate of *A. melanogenum* in the study. In some diploid  
273 genomes loss of heterozygosity was observed over large regions (Supplemental Fig.  
274 S3). Some of these could be explained by aneuploidy (loss of one copy of a  
275 chromosome or part of chromosome), while others appeared to be copy-neutral,  
276 possibly caused by mitotic recombination.

277 A putative mating-type locus was found in the majority of the genomes. While mapping  
278 of sequencing reads of some strains to the reference mating-type locus of each species  
279 contained gaps due to high divergence of the locus, in some other strains the  
280 sequencing coverage indicated the presence of the locus despite its absence in the  
281 whole-genome assembly (Supplemental Figs. S4, S5). The poor assembly of the locus  
282 was particularly problematic in diploid genomes and even more so in the tetraploid  
283 genome of *H. werneckii*, precluding a conclusive analysis in all strains. The absence  
284 of the locus in some strains should at this point in time not be seen as a conclusive  
285 result. However, where entire genes MAT1-1 and MAT1-2 were assembled, they  
286 showed a substantial diversity, clustering into distinct phylogenetic groups  
287 (Supplemental Figs. S4, S5). In case of *H. werneckii* 'blastx' searches against the non-  
288 redundant GenBank protein database showed that one large phylogenetic group of  
289 each locus was highly similar to homologues from other fungi ("true" MAT1-1 and  
290 MAT1-2), while the other groups only produced matches with these "true" *H. werneckii*  
291 homologues, but not with homologues from other fungi, especially in case of MAT1-2,  
292 a result of an intense diversification. In the case of *A. melanogenum*, all putative MAT1-  
293 1 and MAT1-2 could be matched to homologues from other fungi. Phylogenetic groups  
294 of MAT1-1 and MAT1-2 in both species generally corresponded to hybrid and haploid  
295 groups of strains, but with numerous exceptions (Supplemental Figs. S4, S5). For  
296 example, in case of *H. werneckii* hybrid groups generally contained two similar copies

297 of MAT1-1, but groups 1a, 3 and 4 contained very different copies and group 9  
298 consistently lacked one copy of MAT1-1 altogether (possibly due to poor assembly of  
299 the locus). In contrast, two different copies of MAT1-2 were found in group 1, but two  
300 similar copies in group 9. Three distinct copies of the mating-type locus were found in  
301 strain 10. In *A. melanogenum* hybrid group 1 contained only a single well-assembled  
302 homologue of MAT1-1 and two homologues of MAT1-2, but otherwise the diversity of  
303 the mating-type locus in this species was generally lower and mostly corresponded to  
304 groups of hybrids and haploid strains.

305 The search for proteins of the Pfam families HET and Het-C typical of heterokaryon  
306 incompatibility proteins, identified a large number of such proteins in the predicted  
307 proteomes of *A. melanogenum* (on average 4.87 HET and 3.74 Het-C proteins per  
308 strain) and even more in *H. werneckii* (on average 27.82 HET and 3.5 Het-C proteins  
309 per strain) (Supplemental Table S2). Phylogenetic analysis of these proteins showed  
310 that they formed several clusters, some of which contained representatives only from  
311 specific groups of hybrid strains (as identified in Fig. 4). For example, in *H. werneckii*,  
312 the hybrid genomes of groups 9 and 10 (and in one case genome 23) were the only  
313 ones to contain HET genes belonging to phylogenetic clusters 6 and 24 (Supplemental  
314 Table S2). HET proteins from cluster 12 were found only in hybrid groups 1-3 and their  
315 closely related haploid strains (and tetraploid strain 36). In *A. melanogenum*, hybrid  
316 groups 5 and 6 were the only ones to contain HET proteins belonging to a small  
317 phylogenetic cluster 5 (Supplemental Table S2) and similarly hybrid group 2 was the  
318 only one to contain HET proteins from phylogenetic group 6.

319

## 320 **Discussion**

321 Genome sequencing of 66 strains of the black yeast *Hortaea werneckii* and 49 strains  
322 of the black yeast *Aureobasidium melanogenum* revealed some unexpected  
323 similarities between these species, which belong to different orders of the subclass  
324 Dothideomycetidae. Approximately one-third of the sequenced strains of each species  
325 were haploid and approximately two-thirds were diploid. Principal component analysis  
326 of single-nucleotide polymorphisms identified several clusters of strains in each  
327 species. In both cases, the first two principal components explained nearly 60% of the  
328 observed diversity – much more than, for example, in the homogenous and



329 recombining species *Aureobasidium pullulans*, where the first two principal  
330 components together explained less than 15% of the diversity [38]. The clustering of  
331 strains was consistent with the previous reports that both *H. werneckii* and *A.*  
332 *melanogenum* are strictly clonal [1,8]. Despite the presence of a mating-type locus in  
333 the reference genomes of both species [1,39], the clonality of the species was  
334 confirmed here by a high degree of concordance between the phylogenetic histories  
335 of different genomic regions and by a lack of decay in linkage disequilibrium, an  
336 established measure of recombination often expressed as the distance over which  
337 linkage disequilibrium falls to half its maximum value [6].

338 The existence of highly heterozygous intraspecific hybrids, first observed in *H.*  
339 *werneckii* [1], is confirmed here on a much larger genomic data set of *H. werneckii* and  
340 also *A. melanogenum*. The mechanism of hybridization is unknown and could range  
341 from vegetative hyphal fusion between different haploid strains to plasmogamy and  
342 karyogamy of gametes. Regardless of the mechanism, at least some diploid hybrids  
343 appear to be stable over long periods of time, allowing them to disperse over long  
344 distances and constitute a large proportion of the species in some habitats. Hybrid  
345 strains have previously been reported in many other fungal species, including  
346 *Saccharomyces cerevisiae* [40], *Candida tropicalis* [41], and *Cryptococcus*  
347 *neoformans* [42], but none of these species are strictly clonal. However, diploid hybrids  
348 that cannot reproduce sexually have also been reported in some species [43]. The  
349 majority of *Candida orthopsilosis* are hybrids with 5% divergence between their haploid  
350 genomes at the nucleotide level, arising from at least four independent hybridization  
351 events [44]. *Candida metapsilosis* is also a species originating from hybridization, with  
352 a similar divergence between haploid genomes [45]. It is possible that *H. werneckii* and  
353 *A. melanogenum* follow a similar reproductive strategy as the *Candida parapsilosis* /  
354 *C. orthopsilosis* / *C. metapsilosis* group, but in the case of both black yeasts the hybrids  
355 are not recognised as separate species (for reasons discussed below).

356 In the reticulate history of *H. werneckii* and *A. melanogenum*, the unit of genetic  
357 exchange are whole haploid genomes. This allowed us to trace phylogenies of haploid  
358 genomes, for example, in the case of *H. werneckii* (Fig. 4A) of the “green haploid”  
359 genome (strains 2 and 3) and the “red haploid” genome (strains 4 and C), as well as  
360 their “red and green diploid” hybrids (group 1). The absence of haploid strains with  
361 genomes combined from two or more genomic lineages implies that – as is often seen

362 in hybrids – diploids do not revert to haploid state but are stuck at the F1 stage. They  
363 are either unable to undergo meiosis, or the progeny of such meiosis has sufficiently  
364 low viability or fitness to evade sampling. The presence of a putative homothallic  
365 mating-type locus in the majority of sequenced strains and the distribution of diversified  
366 lineages of MAT genes in groups of hybrids and haploids raise the possibility that these  
367 loci play a role in the formation of hybrid lineages. At the same time a substantial  
368 number of strains containing unexpected combinations of MAT lineages, the fast  
369 diversification of the MAT genes (particularly in *H. werneckii*), and the methodological  
370 limitations of the analysis (suboptimal assembly of the putative mating-type locus),  
371 demand further research before providing conclusive evidence on the presence, type  
372 and functionality of mating-type genes, and their possible role in the formation of  
373 hybrids in *H. werneckii* and *A. melanogenum*.

374 While hybridization to diploids and the absence of meiosis is reminiscent of  
375 parasexuality, *H. werneckii* and *A. melanogenum* do not conform to this mode of  
376 reproduction either. In parasexual reproduction diploids typically revert to haploids  
377 through haploidisation – a random loss of chromosomes with the end result similar to  
378 meiosis [18]. In addition to the absence of recombinant haploid strains there is also  
379 little evidence for the existence of intermediate aneuploid states characteristic of  
380 haploidisation. Either such haploidisation does not occur, or its products are not viable  
381 due to incompatibility of parental chromosomes. The aneuploidy observed in both *H.*  
382 *werneckii* and *A. melanogenum* mostly involves increases in ploidy above the diploid  
383 state rather than decreases below it, as would be expected with haploidisation. Thus,  
384 this aneuploidy is almost certainly not part of a parasexual cycle, but might be an  
385 adaptive evolutionary response to adverse or novel conditions – a common adaptive  
386 response of fungi [21–23]. This explanation is also supported by the observations of  
387 large-scale duplications of specific genomic regions in a diploid strain of *H. werneckii*  
388 subjected to long-term experimental evolution at extreme salinity [46]. Interestingly, the  
389 high level of heterozygosity of diploid strains of *H. werneckii* and *A. melanogenum*  
390 resulting from hybridisation is mostly preserved not only by the rarity of large-scale  
391 deletions, but also by the relative scarcity of large-scale copy-neutral loss of  
392 heterozygosity. In other hybrids loss of heterozygosity has been recognised as a  
393 common tool for genome shaping and stabilisation after hybridization [47,48], but  
394 appears to be largely avoided by both *H. werneckii* and *A. melanogenum*.

395 An integral part of fungal parasexuality is the heterokaryon – a cell with two genetically  
396 distinct nuclei that sometimes undergo karyogamy [49]. In *H. werneckii* both haploid  
397 and diploid cells contain a single nucleus per cell [50]. The viability and stability of  
398 heterokaryons are controlled by heterokaryon incompatibility loci. At least three genes  
399 for proteins with domains characteristic of such loci were found in all *A. melanogenum*  
400 genomes and at least 17 in *H. werneckii* (with up to 43 in diploid genomes, although  
401 this number may be an overestimate due to fragmented genome assembly). While it  
402 has been shown in some species that even differences in heterokaryon incompatibility  
403 loci as small as a single amino acid can be sufficient to trigger incompatibility [51], the  
404 diversity of these loci in *H. werneckii* and *A. melanogenum* was much higher than that.  
405 The distribution of certain types of these loci is consistent with the hybrid groups  
406 described above. On the one hand, this could simply reflect the phylogenetic distance  
407 between the strains. On the other hand, it opens the possibility that heterokaryon  
408 incompatibility loci might be involved in the successful formation of diploid hybrids in  
409 *H. werneckii* and *A. melanogenum*.

410

411 Hybrid fungal genomes have so far been described mostly in pathogens of animals or  
412 plants. This is the first time we document the formation of stable and highly  
413 heterozygous diploids in wild populations of two extremotolerant clonal species. Five  
414 aspects of this phenomenon are discussed below.

415 1. Is clonality related to the extremotolerance of *H. werneckii* and *A. melanogenum*? It  
416 has long been speculated that avoiding energetically costly sexual reproduction may  
417 be advantageous in extreme environments, allowing the fixation of beneficial alleles  
418 and genomic configurations in small populations that have managed to adapt to  
419 extreme conditions at the ecological edge of the species [15,16]. One of the  
420 mechanisms that can promote adaptation at the margin of species distribution is  
421 hybridization [52].

422 Of course, sexual reproduction does not only have shortcomings, but also considerable  
423 advantages in adapting to stress [6,13]. The same is true for parasexuality, which not  
424 only alters ploidy but also increases diversity through cycles of regular and double  
425 ploidy. A high frequency of diploids in *Aspergillus fumigatus* has been reported in cystic  
426 fibrosis, presumably due to local stress (e.g., nitrogen deficiency or the presence of

427 certain drugs) that promotes parasexual recombination [19]. In *Candida albicans*,  
428 which can undergo regular sexual recombination, stress additionally promotes the  
429 parasexual cycle, which generates a high degree of diversity, including aneuploidy  
430 [53].

431 There are also several examples of at least occasionally recombining extremotolerant  
432 and extremophilic species. For example, the polyextremotolerant yeast *Aureobasidium*  
433 *pullulans*, a close relative of *A. melanogenum*, has one of the highest rates of  
434 recombination demonstrated in fungi by population genomics [38]. Two salt-adapted  
435 basidiomycetes, the halotolerant *Wallemia mellicola* and the halophilic *Wallemia*  
436 *ichthyophaga*, also appear to recombine, albeit much less frequently than *A. pullulans*,  
437 even though *W. ichthyophaga* is exceptionally rare and limited to highly fragmented  
438 environments [10,54]. If clonality or hybridization are indeed beneficial for adaptation  
439 to extreme conditions – and more data are needed to test this hypothesis –  
440 recombination appears to be compatible with extremotolerant lifestyle as well.

441 2. Do clonality and hybridization allow for greater specialisation? While recombination  
442 generates potentially useful diversity and thus provides substrate for natural selection,  
443 it can also break successful genomic configurations – a shortcoming known as  
444 recombination load [14–16]. In well-adapted subpopulations clonality prevents  
445 beneficial adaptations from being diluted by gene flow from other environments, which  
446 promote different adaptations. Clonal lineages may thus be more successful in the  
447 short term, but may collapse due to reduced adaptability or Muller’s ratchet and are  
448 replaced by the next successful clone, which can be generated by sexual or parasexual  
449 recombination – or hybridization [55].

450 Some species are able to thrive in a wide range of different environments without  
451 adapting to any of them at the genomic level – the ubiquitous and polyextremotolerant  
452 *A. pullulans* is one such example [38]. But while *A. pullulans* is an exceptionally  
453 generalistic species, the two species analysed here are less so: *A. melanogenum* is  
454 mostly restricted to aquatic and indoor environments, while *H. werneckii* is mostly  
455 found in marine and hypersaline environments and has a much higher upper salinity  
456 growth limit than *A. pullulans*. The preference of some *H. werneckii* and *A.*  
457 *melanogenum* strain groups for specific habitats (Fig. 4) possibly indicates an ongoing  
458 clonality-driven specialisation of these groups. This would be in line with the suggestion  
459 of Romeo et al. [36]. However, based on the here studied dataset the observed habitat

460 preferences might be an artefact of skewed geographic distribution due to limited  
461 dispersal and unequal habitat sampling in different locations.

462 Interestingly, the clinical isolates of *H. werneckii* belong to different strain groups within  
463 the species (Fig. 4). Although the number of clinical isolates analysed here was too  
464 small to draw reliable conclusions, this could mean that no lineage within the species  
465 is better able to cause infections in humans than others. Aneuploidy was observed in  
466 four out of five analysed clinical strains of both species. As discussed above,  
467 aneuploidy can be a signature of adaptation to novel environments [21–23]. Both *H.*  
468 *werneckii* and *A. melanogenum* are opportunistic pathogens that rarely cause  
469 infections. The conditions they encounter in the human body are almost certainly  
470 suboptimal for their survival [56,57], resulting in high selection pressure and possibly  
471 in aneuploidies. However, due to their rarity, such infections most likely do not  
472 contribute meaningfully to the evolution and specialisation of either of the two species  
473 [56].

474 3. If the formation of diploids in *H. werneckii* and *A. melanogenum* is irreversible, what  
475 drives the co-existence of diploid and haploid strains? A study of 12 *H. werneckii*  
476 genomes reported 7 successful intraspecific hybridization events, and expansion of  
477 the data set to 66 genomes uncovered only 2 or 3 additional hybridizations in the  
478 history of the species. While isolation of strains from novel environments or geographic  
479 locations might lead to the discovery of new hybrid lineages, their number is likely to  
480 remain limited. This might indicate that intraspecific hybridization events are relatively  
481 uncommon or that only a small number of them result in offspring with sufficient fitness  
482 to persist in the environment. The co-existence of haploid and diploid strains may be  
483 supported by their divergent performance in different conditions. A preliminary  
484 comparison of halotolerance between diploid and haploid strains shows slightly higher  
485 halotolerance of diploid *A. melanogenum*, but no such difference in *H. werneckii* (our  
486 unpublished data), but this comparison was limited to only one parameter tested in a  
487 laboratory setting. The possibility of different adaptation value of haploids vs. diploids  
488 should be more carefully addressed in the future, for example by competition  
489 experiments.

490 Whatever the mechanism of hybridization, it appears to operate almost exclusively  
491 between haploid strains, and compared to many other fungal species [21] the range of  
492 observable ploidies in *H. werneckii* and *A. melanogenum* is modest. Although a

493 randomly selected environmental strain is about twice as likely to be diploid as haploid,  
494 a single tetraploid strain of *H. werneckii* is the only evidence that these diploids can  
495 hybridize further. No triploid strains of either species have been found. Either the fusion  
496 of diploid cells is prevented by some as yet unknown mechanism, or the resulting  
497 strains do not persist in the environment long enough to be detected.

498 4. How should the hybrids of clonal species be treated in taxonomy? In such situation  
499 even the definition of otherwise well-established terminology is not trivial. For example,  
500 Naranjo–Ortiz and Gabaldón [22] defined hybrids as lineages emerging from  
501 ancestors, which differ from each other more than the most distant strains of well-  
502 recognised species. According to Boekhout et al. [47], lineages of interspecific hybrids  
503 can be recognised as separate species, while intraspecific hybrids better fit in the  
504 concept of varieties. This returns us to the problem of species delineation in clonal  
505 taxa, which may involve arbitrary decisions. On the one hand, diversity in *H. werneckii*  
506 is high, and distances between genomes of some strains are substantially greater than  
507 what is typical for fungal species [58]. On the other hand, Fig. 4 clearly illustrates why  
508 a more fragmented taxonomy of *Hortaea* would result in unpractical taxonomic  
509 inflation. If hybrids and the remaining monophyletic groups of haploids were treated as  
510 species, *H. werneckii* could easily be split into 15 or more new species. In several of  
511 these new species two different sequences of standard taxonomic markers carried by  
512 a single diploid strain [33] would in many cases belong to different species – a  
513 decidedly untenable situation. Similarly, if all haploid strains were treated as one  
514 species and all diploids as another, such species would be polyphyletic. Since clonality  
515 precludes the application of the biological species concept to *H. werneckii*, we suggest  
516 the dense reticulation of its phylogeny can be pragmatically interpreted as an analogue  
517 of interbreeding. Thus, a single *H. werneckii* species is maintained despite its high  
518 diversity, as suggested also by a recent in-depth phylogenetic study of the taxon [33].  
519 Although a comparably detailed taxonomic revision of *Aureobasidium melanogenum*  
520 is still pending, it is expected to lead to a similar outcome.

521 5. How common is hybridisation in clonal fungi? Clonality itself appears to be much  
522 rarer in fungi than once believed, but population genomic studies of *Neurospora* spp.  
523 showed that even closely related species can differ substantially in their reproductive  
524 strategies [3]. This is also the case here: while *A. melanogenum* is clonal, the closely  
525 related species *A. pullulans* has exceptionally high recombination rates [38]. Genome

526 sequencing of another species of the genus, *Aureobasidium subglaciale*, revealed a  
527 small number of apparently clonal diploid strains that may belong to a new species [8],  
528 the reproductive strategy of which should be investigated if more such strains can be  
529 isolated and sequenced.

530 Of five fungal species from extreme environments that we have previously studied  
531 using population genomics, two were strictly clonal and both contained stable diploid  
532 intraspecific hybrids. This situation is at least similar to the one described in the  
533 *Candida parapsilosis* / *C. orthopsilosis* / *C. metapsilosis* group [48]. Other examples  
534 may include the plant pathogen *Verticillium longisporum* [59], and some clinically  
535 relevant hybrids of *Cryptococcus* spp. [60] and *Aspergillus* spp. [61]. Such reproductive  
536 strategy may thus be more common than currently known, especially since it can be  
537 easily overlooked without performing careful population genomic studies. Polyploid  
538 strains often produce highly fragmented but otherwise inconspicuous assemblies, and  
539 even after genome sequencing, hybrids, polyploids, and aneuploids can easily go  
540 undetected [22]. Any study that discovers genomes of different ploidy in clonal fungal  
541 species should investigate hybridization as a possible explanation for the data.

542

## 543 **Conclusions**

544 Genome sequencing of two black yeasts from extreme environments, *H. werneckii* and  
545 *A. melanogenum*, revealed that both species are strictly clonal. Their populations  
546 consist of both haploid and diploid strains, and diploid strains were formed by a handful  
547 of intraspecific hybridization events between haploids. These hybridizations were not  
548 followed by meiosis as part of sexual reproduction, nor by haploidisation through  
549 random chromosome loss, as is typical of parasexuality. Hybrid lineages avoid the loss  
550 of heterozygosity even over timeframes allowing them to disperse over large  
551 geographic distances. Such “stable parasexuality”, a process of forming stable and  
552 highly heterozygous diploids in a clonal species without evidence of subsequent  
553 meiosis or haploidisation, is an unusual reproductive strategy, which merits further  
554 study. This is the first time it has been documented in wild populations of  
555 extremotolerant fungi. The increasing use of population genomics in fungi will show  
556 whether this reproductive strategy is more widespread than is currently known and

557 careful comparative studies should investigate its potential role in adaptation to  
558 extreme (and other) environments.

559

## 560 **Materials and methods**

### 561 ***Cultivation and DNA isolation***

562 Strains of the extremely halotolerant *Hortaea werneckii* (Table 1) were obtained from  
563 the Ex Culture Collection of the Department of Biology, Biotechnical Faculty, University  
564 of Ljubljana (IC Mycosmo, MRIC UL, Slovenia). The cultivation and DNA isolation were  
565 performed as described previously [1], using the standard chemically defined Yeast  
566 Nitrogen Base medium (Qbiogene). Biomass harvested from liquid cultures was frozen  
567 in liquid nitrogen and kept at -80 °C until DNA isolation, performed as described  
568 previously [1], using the UltraClean Microbial DNA isolation kit (MO BIO Laboratories,  
569 USA), preceded by homogenisation with a pestle and mortar in liquid nitrogen and 1  
570 min in Retsch Mixer Mill 301 (ThermoFisher Scientific, USA) at 20 Hz. After the RNase  
571 A treatment (ThermoFisher Scientific, USA), the isolated DNA was evaluated using  
572 agarose electrophoresis and by fluorometry (Qubit; ThermoFisher Scientific, USA).

573

### 574 ***Genome sequencing***

575 The genome sequencing was performed using the platform BGISEQ-500, with 2×150-  
576 bp libraries, prepared as described previously [62], with multiplexed sequencing  
577 barcodes. The resulting output was demultiplexed, the quality was checked with  
578 FastQC, and the reads were trimmed for adaptors and quality (removal of bases with  
579 Q <20) using the 'bbduk' script (<https://jgi.doe.gov/data-and-tools/bbtools/>).

580 The raw sequencing reads have been deposited in China National GeneBank  
581 Sequence Archive (CNSA) of China National GeneBank DataBase (CNGBdb) with  
582 accession number CNP0001993. Sequencing reads together with assembly and  
583 annotation data have been deposited in Genbank under BioProject PRJNA428320.  
584 Genome sequences of previously sequenced *H. werneckii* strains [1] are deposited in  
585 Genbank under the same BioProject (PRJNA428320). Genome sequences of  
586 previously sequenced *A. melanogenum* strains [8] are deposited in Genbank under the  
587 BioProject PRJNA721240 and listed in Table 2. Genome 7 from the study by Černoša



588 et al. [8] was excluded from this study due to the large phylogenetic distance from other  
589 *A. melanogenum* strains, while strains 2, 18, and 38 were excluded from phylogenetic  
590 analyses based on alignments produced by SibeliaZ (described below) due to their  
591 unclear ploidy.

592

### 593 **Variant calling**

594 Sequencing reads of *H. werneckii* genomes were mapped to the reference genome of  
595 *H. werneckii* EXF-2000 (GenBank MUNK00000000.1 [35]), which was first haploidised  
596 with HaploMerger2 [63]. Mapping was performed by ‘bwa mem’, using the default  
597 parameters. The reads were sorted with Samtools 1.6 [64], deduplicating with Picard  
598 2.10.2 and then used for variant calling with Genome Analysis Toolkit 4.1 [65], following  
599 the ‘Genome Analysis Toolkit (GATK) Best Practices’ workflow in diploid mode, but  
600 using ‘hard filtering’ with the expression ‘QD < 2.0 || FS > 20.0 || SOR > 3.0 || MQ <  
601 50.0’. Strain 36 was excluded from the analysis due to its tetraploid genome. Variants  
602 of *A. melanogenum* genomes were determined by Černoša et al. [8].

603

### 604 **Variant-based analysis**

605 Variant-based analyses for both *H. werneckii* and *A. melanogenum* were performed in  
606 R [66], except the calculation of the linkage disequilibrium squared correlation  
607 coefficient ( $r^2$ ; described below). Genomes were clustered based on the single-  
608 nucleotide polymorphism data using the principal component analysis with the ‘glPca’  
609 function of the ‘adgenet’ package in R [67]. The phylogenetic networks estimated from  
610 SNP data were reconstructed with the Neighbor-Net algorithm of the package  
611 ‘phangorn’ [68] based on a dissimilarity distance matrix calculated with the package  
612 ‘poppr’ [69].

613 Linkage disequilibrium squared correlation coefficient ( $r^2$ ) was calculated for all pairs  
614 of biallelic SNP loci within 10 000 nucleotides of each other with ‘vcftools’ [70]. Then  $r^2$   
615 was plotted as a function of distance between pairs of loci using ‘ggplot2’ [71]. A  
616 generalized additive model (“gam”) curve was fitted to the data.

617

## 618 **Assembly and annotation**

619 Reference-guided genome assembly was performed for all here sequenced *H.*  
620 *werneckii* genomes with IDBA-Hybrid 1.1.3 [72] using the same reference as for variant  
621 calling. The maximum k value selected was 120, the minimum support in each iteration  
622 was 2, the similarity threshold for alignment was 0.95, seed kmer was 20, maximum  
623 allowed gap in the reference was 100, and the minimum size of contigs included in the  
624 final assembly was 500. Genomes were annotated with Augustus 3.4 [73]. Augustus  
625 parameters were optimised with training using the scripts provided with the program  
626 with (i) the RNAseq data from Sinha et al. [35] deposited at GenBank Sequence Read  
627 Archive with the accession number SRP094740 and (ii) all predicted proteins of *H.*  
628 *werneckii* EXF-2000 (GenBank MUNK00000000.1). These hints were also used for  
629 the final annotation.

630 Predicted proteomes were benchmarked with the BUSCO 4.1.1 [74] using the default  
631 parameter values and the data set of benchmarking universal single-copy orthologs  
632 (BUSCOs) for Dothideomycetes [75].

633 The ploidy of the genomes was determined based on the following criteria for both  
634 species: haploids had a genome size smaller than 31 Mbp, number of predicted genes  
635 smaller than 13 000 and the average copy number of core BUSCOs (those present in  
636 all strains of the species) lower than 1.1. Diploid strains had a genome size larger than  
637 46 Mbp, number of predicted genes greater than 18 000 and the average copy number  
638 of core BUSCOs greater than 1.5. The ploidy of genomes with any of the criteria  
639 between the above thresholds was labelled as “unclear” (Table 2).

640 The files for submission to GenBank were prepared with the Genome Annotation  
641 Generator (GAG) 2.0.1 [76]. Gene models with short coding regions (<150 bp) and/or  
642 introns (<10 bp) were removed before the submission.

643

## 644 **Phylogenetic analyses**

645 SibeliaZ 1.2.2 [77] was used to align parts of the genomes of both *H. werneckii* and *A.*  
646 *melanogenum* into multiple sequence alignments. The parameters used were k=21,  
647 a=150, b=15000. Alignments were then filtered to keep only those in which the number  
648 of sequences from each genome exactly matched the ploidy of the genome.  
649 Alignments were optimised with Gblocks 0.91 [78], using the options '-b3=10 -b4=3 -

650 b5=n' and then inspected manually to trim the ends to the shortest sequence in the  
651 alignment and remove any alignments with more than 15% gaps over the whole  
652 alignment length in any of the sequences of *H. werneckii* or 25% in case of *A.*  
653 *melanogenum*. Fifty longest alignments (lengths of 1364 bp to 5089 bp for *H. werneckii*  
654 and 3400 bp to 13257 bp for *A. melanogenum*) were selected for each species and  
655 each alignment was used for the estimation of the phylogenetic tree with IQ-TREE  
656 2.0.3 using standard model selection and 1000 replicates for the SH approximate  
657 likelihood ratio test [79]. The resulting collection of 50 phylogenetic trees for each  
658 species was visualized as an overlay using 'densiTree()' from the 'phangorn' package  
659 in R [68] and as a consensus supernetwork using SplitsTree 4.16.2 [80]. These  
660 visualisations and a majority rule consensus tree calculated with the  
661 'consensus.edges' from the package 'phytools' in R [81] were used to draw a  
662 schematic representation of phylogenetic histories of genomes in the open-source  
663 vector graphics software Inkscape 1.1 (<http://inkscape.org>). Enrichment of  
664 phylogenetic clusters of strains for certain geographic origin or habitat was analysed  
665 in R using Fisher's Exact Test with simulated p-value [66].

666 Genes with HET (PF06085) and Het-C (PF07217) domains were identified in predicted  
667 proteomes of all strains investigated in this study (Table 1,2) with 'hmmsearch' 3.3.1  
668 and HMM profiles with default parameters from the Pfam-A.hmm database version  
669 34.0 [82]. The identified proteins were aligned with Mafft 7.475 [83] and the alignments  
670 were used for reconstruction of phylogenies with IQ-TREE 2.0.3 using standard model  
671 selection and 1000 replicates for the SH approximate likelihood ratio test [79].

672 Putative mating-type loci were identified in the genomes with stand-alone BLAST  
673 2.9.0+ [84], aligned with Mafft 7.475 [83], and annotated based on previously published  
674 annotations of mating-type loci in *H. werneckii* [1] and *A. melanogenum* [39].  
675 Phylogeny of putative MAT1-1 and MAT1-2 homologues was estimated with IQ-TREE  
676 2.0.3 using standard model selection and 1000 replicates for the SH approximate  
677 likelihood ratio test [79] after first excluding all putative homologues truncated to less  
678 than 80% of expected length due to suboptimal genome assembly.

679

680 ***Detection of aneuploidies and loss of heterozygosity***

681 Per-nucleotide sequencing depth of reads mapped to the reference genome as  
682 described above was calculated with Samtools 1.6 [64]. For each sequenced genome  
683 the median values of per-nucleotide depths in 30 kbp windows were plotted as  
684 proportion of the median depth of the whole genome. These values were calculated in  
685 R and visualised with 'ggplot2' [66,71] for 50 longest reference genome contigs in the  
686 case of *H. werneckii* and for 35 longest reference genome contigs in the case of *A.*  
687 *melanogenum*.

688 Evidence for loss of heterozygosity in diploid genomes was searched for by counting  
689 the number of heterozygous SNPs in 25 kbp windows along the longest reference  
690 genome contigs (50 in case of *H. werneckii*, 35 in case of *A. melanogenum*) and plotted  
691 as proportion of the median heterozygosity of each genome with 'ggplot2' [66,71].  
692 Depth of sequencing was plotted as described above, but in 25 kbp windows, to  
693 distinguish between copy-neutral loss of heterozygosity and loss of heterozygosity  
694 caused by aneuploidy.

695

## 696 **Acknowledgements**

697 The authors would like to thank Yonglun Luo (Lars Bolund Institute of Regenerative  
698 Medicine, Qingdao-Europe Advanced Institute for Life Sciences, BGI-Qingdao; BGI-  
699 Shenzhen; Department of Biomedicine, Aarhus University) for supporting the work on  
700 genomics of fungi from extreme environments; Yuchong Tang (China National  
701 GeneBank, BGI-Shenzhen) for his invaluable help in project management,  
702 organization of scientific visits and facilitation of collaboration between the project  
703 partners; and Toni Gabaldón (Biomedical Research Institute (IRB), Barcelona  
704 Supercomputing Centre (BSC)) for inspiring and constructive discussions on  
705 hybridization in fungi. The authors thank Rafael R. Montalvo-Rodriguez (University of  
706 Puerto Rico) for the strains EXF-2515 and EXF-2516; Filomena de Leo (University of  
707 Messina, Italy) for the strains EXF-10508 to EXF-10512; Armando Azua Bustos  
708 (Pontificia Universidad Católica de Chile) for the strains EXF-11540, EXF-11650 and  
709 EXF-11651; Zhu-Hua Luo (Third Institute of Oceanography, China) for the strains EXF-  
710 12619 and EXF-12620; Amy Gladfelter (University of North Carolina) for the strains  
711 EXF-14591 and EXF-14592; and Christine Beemelmans (Hans Knöll Institute,  
712 Germany) for the strain EXF-14590. We acknowledge the China National Gene Bank  
713 for the support of sequencing library preparation and shotgun sequencing. This study  
714 was supported by funding from the Slovenian Research Agency to Infrastructural  
715 Centre Mycosmo (MRIC UL I0-0022), programmes P4-0432, P1-0198, and project J4-  
716 2549.

717

## 718 **Authors contributions**

719 Conceptualization of the study: NGC, ZS and CG; experimental work: XS, AČ, and CF;  
720 bioinformatic analyses: CG; data curation: CG; resources: ZS, NGC; preparation of the  
721 manuscript and visualisations: CG; review and editing of the manuscript: CG, NGC,  
722 AČ, XS, CF and ZS; supervision: ZS and NGC; funding acquisition: NGC, ZS.

723

## 724 **Declarations**

## 725 **Funding**

726 The authors acknowledge the China National Gene Bank for the support of sequencing  
727 library preparation and shotgun sequencing. This study was supported by funding from  
728 the Slovenian Research Agency to Infrastructural Centre Mycosmo (MRIC UL),  
729 programmes P1-0170, P1-0198, project J4-2549, and young researcher grant to Anja  
730 Černoša.

731 **Conflicts of interest/Competing interests**

732 Not applicable.

733 **Ethics approval**

734 Not applicable.

735 **Availability of data and material**

736 All data used in the study are available via GenBank (BioProject: PRJNA721240 and  
737 BioProject: PRJNA428320). Supporting data, including alignments, SNPs, annotations  
738 and phylogenetic tree files, are available via the *Gigascience* database GigaDB [85].

739

## 740 **References**

- 741 1. Gostinčar C, Stajich JE, Zupančič J, Zalar P, Gunde-Cimerman N. Genomic  
742 evidence for intraspecific hybridization in a clonal and extremely halotolerant yeast.  
743 *BMC Genomics*. 2018; doi: 10.1186/s12864-018-4751-5.
- 744 2. Brown A. Mating in mushrooms: increasing the chances but prolonging the affair.  
745 *Trends Genet*. 2001; doi: 10.1016/S0168-9525(01)02343-5.
- 746 3. Gladieux P, De Bellis F, Hann-Soden C, Svedberg J, Johannesson H, Taylor JW.  
747 *Neurospora* from natural populations: Population genomics insights into the life history  
748 of a model microbial eukaryote. In: Y. DJ, editor. *Stat Popul Genomics*. New York:  
749 Humana;
- 750 4. Hawksworth DL, Kirk PM, Sutton BC, Pegler DN. Ainsworth & Bisby's Dictionary of  
751 the Fungi. 8th ed. Oxford University Press;
- 752 5. Tibayrenc M, Ayala FJ. Reproductive clonality of pathogens: A perspective on  
753 pathogenic viruses, bacteria, fungi, and parasitic protozoa. *Proc Natl Acad Sci*. 2012;  
754 doi: 10.1073/pnas.1212452109.
- 755 6. Taylor JW, Hann-Soden C, Branco S, Sylvain I, Ellison CE. Clonal reproduction in  
756 fungi. *Proc Natl Acad Sci*. 2015; doi: 10.1073/pnas.1503159112.
- 757 7. Carreté L, Ksiezopolska E, Pegueroles C, Gómez-Molero E, Saus E, Iraola-Guzmán  
758 S, et al.. Patterns of genomic variation in the opportunistic pathogen *Candida glabrata*  
759 suggest the existence of mating and a secondary association with humans. *Curr Biol*.  
760 2018; doi: 10.1016/j.cub.2017.11.027.
- 761 8. Černoša A, Sun X, Gostinčar C, Fang C, Gunde-Cimerman N, Song Z. Virulence  
762 traits and population genomics of the black yeast *Aureobasidium melanogenum*. *J*  
763 *Fungi*. 2021; doi: 10.3390/jof7080665.
- 764 9. Kasuga T, White TJ, Koenig G, Mcewen J, Restrepo A, Castañeda E, et al..  
765 Phylogeography of the fungal pathogen *Histoplasma capsulatum*. *Mol Ecol*. 2003; doi:  
766 10.1046/j.1365-294X.2003.01995.x.
- 767 10. Gostinčar C, Sun X, Zajc J, Fang C, Hou Y, Luo Y, et al.. Population genomics of  
768 an obligately halophilic basidiomycete *Wallemia ichthyophaga*. *Front Microbiol*. 2019;  
769 doi: 10.3389/fmicb.2019.02019.
- 770 11. Tsai IJ, Bensasson D, Burt A, Koufopanou V. Population genomics of the wild yeast  
771 *Saccharomyces paradoxus*: Quantifying the life cycle. *Proc Natl Acad Sci*. 2008; doi:  
772 10.1073/pnas.0707314105.

- 773 12. Xu J. Cost of interacting with sexual partners in a facultative sexual microbe.  
774 *Genetics*. 2005; doi: 10.1534/genetics.105.045302.
- 775 13. Sun S, Heitman J. Is sex necessary? *BMC Biol*. 2011; doi: Artn 56 Doi  
776 10.1186/1741-7007-9-56.
- 777 14. Otto SP. The evolutionary enigma of sex. *Am Nat*. 2009; doi: 10.1086/599084.
- 778 15. Gostinčar C, Grube M, De Hoog S, Zalar P, Gunde-Cimerman N. Extremotolerance  
779 in fungi: evolution on the edge. *FEMS Microbiol Ecol*. 2010; doi: 10.1111/j.1574-  
780 6941.2009.00794.x.
- 781 16. Gostinčar C, Gunde-Cimerman N, Grube M. Polyextremotolerance as the fungal  
782 answer to changing environments. In: Bakermans C, editor. *Microb Evol under Extrem*  
783 *Cond*. Berlin, München, Boston: De Gruyter;
- 784 17. Pontecorvo G. The parasexual cycle in fungi. *Annu Rev Microbiol*. 1956; doi:  
785 10.1146/annurev.mi.10.100156.002141.
- 786 18. Clutterbuck AJ. Parasexual recombination in fungi. *J Genet*. 1996; doi:  
787 10.1007/BF02966308.
- 788 19. Engel T, Verweij PE, van den Heuvel J, Wangmo D, Zhang J, Debets AJM, et al..  
789 Parasexual recombination enables *Aspergillus fumigatus* to persist in cystic fibrosis.  
790 *ERJ Open Res*. 2020; doi: 10.1183/23120541.00020-2020.
- 791 20. Todd RT, Forche A, Selmecki A. Ploidy variation in fungi: Polyploidy, aneuploidy,  
792 and genome evolution. *Microbiol Spectr*. 2017; doi: 10.1128/microbiolspec.FUNK-  
793 0051-2016.
- 794 21. Gerstein AC, Sharp NP. The population genetics of ploidy change in unicellular  
795 fungi. *FEMS Microbiol Rev*. 2021; doi: 10.1093/femsre/fuab006.
- 796 22. Naranjo–Ortiz MA, Gabaldón T. Fungal evolution: cellular, genomic and metabolic  
797 complexity. *Biol Rev*. 2020; doi: 10.1111/brv.12605.
- 798 23. Hill R, Leitch IJ, Gaya E. Targeting Ascomycota genomes: what and how big?  
799 *Fungal Biol Rev*. 2021; doi: 10.1016/j.fbr.2021.03.003.
- 800 24. Chen G, Rubinstein B, Li R. Whole chromosome aneuploidy: Big mutations drive  
801 adaptation by phenotypic leap. *BioEssays*. 2012; doi: 10.1002/bies.201200069.
- 802 25. Gerstein AC, Lim H, Berman J, Hickman MA. Ploidy tug-of-war: Evolutionary and  
803 genetic environments influence the rate of ploidy drive in a human fungal pathogen.  
804 *Evolution (N Y)*. 2017; doi: 10.1111/evo.13205.
- 805 26. Peter J, De Chiara M, Friedrich A, Yue J-X, Pflieger D, Bergström A, et al.. Genome  
806 evolution across 1,011 *Saccharomyces cerevisiae* isolates. *Nature*. 2018; doi:



807 10.1038/s41586-018-0030-5.

808 27. Depotter JR, Seidl MF, Wood TA, Thomma BP. Interspecific hybridization impacts  
809 host range and pathogenicity of filamentous microbes. *Curr Opin Microbiol.* 2016; doi:  
810 10.1016/j.mib.2016.04.005.

811 28. Samarasinghe H, You M, Jenkinson TS, Xu J, James TY. Hybridization facilitates  
812 adaptive evolution in two major fungal pathogens. *Genes (Basel).* 2020; doi:  
813 10.3390/genes11010101.

814 29. Morrow CA, Fraser JA. Ploidy variation as an adaptive mechanism in human  
815 pathogenic fungi. *Semin Cell Dev Biol.* 2013; doi: 10.1016/j.semcd.2013.01.008.

816 30. Forche A. Large-scale chromosomal changes and associated fitness  
817 consequences in pathogenic fungi. *Curr Fungal Infect Rep.* 2014; doi:  
818 10.1007/s12281-014-0181-2.

819 31. Gunde-Cimerman N, Zalar P, Hoog S, Plemenitaš A. Hypersaline waters in  
820 salterns - natural ecological niches for halophilic black yeasts. *FEMS Microbiol Ecol.*  
821 2000; doi: 10.1111/j.1574-6941.2000.tb00716.x.

822 32. Plemenitaš A, Lenassi M, Konte T, Kejžar A, Zajc J, Gostinčar C, et al.. Adaptation  
823 to high salt concentrations in halotolerant/halophilic fungi: a molecular perspective.  
824 *Front Microbiol.* 2014; doi: 10.3389/fmicb.2014.00199.

825 33. Zalar P, Zupančič J, Gostinčar C, Zajc J, de Hoog GSS, De Leo F, et al.. The  
826 extremely halotolerant black yeast *Hortaea werneckii* - a model for intraspecific  
827 hybridization in clonal fungi. *IMA Fungus.* 2019; doi: 10.1186/s43008-019-0007-5.

828 34. Lenassi M, Gostinčar C, Jackman S, Turk M, Sadowski I, Nislow C, et al.. Whole  
829 genome duplication and enrichment of metal cation transporters revealed by *de novo*  
830 genome sequencing of extremely halotolerant black yeast *Hortaea werneckii*. *PLoS*  
831 *One.* 2013; doi: 10.1371/journal.pone.0071328.

832 35. Sinha S, Flibotte S, Neira M, Formby S, Plemenitaš A, Gunde-Cimerman N, et al..  
833 Insight into the recent genome duplication of the halophilic yeast *Hortaea werneckii*:  
834 Combining an improved genome with gene expression and chromatin structure. *G3-*  
835 *Genes Genomes Genet.* 2017; doi: 10.1534/g3.117.040691.

836 36. Romeo O, Marchetta A, Giosa D, Giuffrè L, Urzì C, De Leo F. Whole genome  
837 sequencing and comparative genome analysis of the halotolerant deep sea black yeast  
838 *Hortaea werneckii*. *Life.* 2020; doi: 10.3390/life10100229.

839 37. Azua-Bustos A, Gonzalez-Silva C, Salas L, Palma RE, Vicuna R. A novel subaerial  
840 *Dunaliella* species growing on cave spiderwebs in the Atacama Desert. *Extremophiles.*

841 2010; doi: 10.1007/s00792-010-0322-7.

842 38. Gostinčar C, Turk M, Zajc J, Gunde-Cimerman N. Fifty *Aureobasidium pullulans*  
843 genomes reveal a recombining polyextremotolerant generalist. *Environ Microbiol.*  
844 2019; doi: 10.1111/1462-2920.14693.

845 39. Gostinčar C, Ohm RA, Kogej T, Sonjak S, Turk M, Zajc J, et al.. Genome  
846 sequencing of four *Aureobasidium pullulans* varieties: biotechnological potential,  
847 stress tolerance, and description of new species. *BMC Genomics.* 2014; doi:  
848 10.1186/1471-2164-15-549.

849 40. Zhu YO, Sherlock G, Petrov DA. Whole genome analysis of 132 clinical  
850 *Saccharomyces cerevisiae* strains reveals extensive ploidy variation. *G3*  
851 *Genes/Genomes/Genetics.* 2016; doi: 10.1534/g3.116.029397.

852 41. O'Brien CE, Oliveira-Pacheco J, Ó Cinnéide E, Haase MAB, Hittinger CT, Rogers  
853 TR, et al.. Population genomics of the pathogenic yeast *Candida tropicalis* identifies  
854 hybrid isolates in environmental samples. Vylkova S, editor. *PLOS Pathog.* 2021; doi:  
855 10.1371/journal.ppat.1009138.

856 42. Rhodes J, Desjardins CA, Sykes SM, Beale MA, Vanhove M, Sakthikumar S, et  
857 al.. Tracing genetic exchange and biogeography of *Cryptococcus neoformans* var.  
858 *grubii* at the global population level. *Genetics.* 2017; doi:  
859 10.1534/genetics.117.203836.

860 43. Gabaldón T. Hybridization and the origin of new yeast lineages. *FEMS Yeast Res.*  
861 2020; doi: 10.1093/femsyr/foaa040.

862 44. Prysycz LP, Németh T, Gácsér A, Gabaldón T. Genome comparison of *Candida*  
863 *orthopsilosis* clinical strains reveals the existence of hybrids between two distinct  
864 subspecies. *Genome Biol Evol.* 2014; doi: 10.1093/gbe/evu082.

865 45. Prysycz LP, Németh T, Saus E, Ksiezopolska E, Hegedúsová E, Nosek J, et al..  
866 The genomic aftermath of hybridization in the opportunistic pathogen *Candida*  
867 *metapsilosis*. Zhang J, editor. *PLOS Genet.* 2015; doi: 10.1371/journal.pgen.1005626.

868 46. Gostinčar C, Stajich JE, Kejžar A, Sinha S, Nislow C, Lenassi M, et al.. Seven  
869 years at high salinity — experimental evolution of the extremely halotolerant black  
870 yeast *Hortaea werneckii*. *J Fungi.* 2021; doi: 10.3390/jof7090723.

871 47. Boekhout T, Aime MC, Begerow D, Gabaldón T, Heitman J, Kemler M, et al.. The  
872 evolving species concepts used for yeasts: from phenotypes and genomes to  
873 speciation networks. *Fungal Divers.* 2021; doi: 10.1007/s13225-021-00475-9.

874 48. Mixão V, Gabaldón T. Hybridization and emergence of virulence in opportunistic

875 human yeast pathogens. *Yeast*. 2018; doi: 10.1002/yea.3242.

876 49. Strom NB, Bushley KE. Two genomes are better than one: history, genetics, and  
877 biotechnological applications of fungal heterokaryons. *Fungal Biol Biotechnol*. 2016;  
878 doi: 10.1186/s40694-016-0022-x.

879 50. Mitchison-Field LMY, Vargas-Muñiz JM, Stormo BM, Vogt EJD, Van Dierdonck S,  
880 Pelletier JF, et al.. Unconventional cell division cycles from marine-derived yeasts. *Curr*  
881 *Biol*. 2019; doi: 10.1016/j.cub.2019.08.050.

882 51. Saupe SJ. Molecular genetics of heterokaryon incompatibility in filamentous  
883 Ascomycetes. *Microbiol Mol Biol Rev*. 2000; doi: 10.1128/MMBR.64.3.489-502.2000.

884 52. Gladieux P, Ropars J, Badouin H, Branca A, Aguilera G, Vienne DM, et al.. Fungal  
885 evolutionary genomics provides insight into the mechanisms of adaptive divergence in  
886 eukaryotes. *Mol Ecol*. 2014; doi: 10.1111/mec.12631.

887 53. Berman J, Hadany L. Does stress induce (para)sex? Implications for *Candida*  
888 *albicans* evolution. *Trends Genet*. 2012; doi: 10.1016/j.tig.2012.01.004.

889 54. Sun X, Gostinčar C, Fang C, Zajc J, Hou Y, Song Z, et al.. Genomic Evidence of  
890 Recombination in the Basidiomycete *Wallemia mellicola*. *Genes (Basel)*. 2019; doi:  
891 10.3390/genes10060427.

892 55. Drenth A, McTaggart AR, Wingfield BD. Fungal clones win the battle, but  
893 recombination wins the war. *IMA Fungus*. 2019; doi: 10.1186/s43008-019-0020-8.

894 56. Gostinčar C, Zajc J, Lenassi M, Plemenitaš A, de Hoog S, Al-Hatmi AMS, et al..  
895 Fungi between extremotolerance and opportunistic pathogenicity on humans. *Fungal*  
896 *Divers*. 2018; doi: 10.1007/s13225-018-0414-8.

897 57. Zajc J, Gostinčar C, Černoša A, Gunde-Cimerman N. Stress-tolerant yeasts:  
898 Opportunistic pathogenicity versus biocontrol potential. *Genes (Basel)*. 2019; doi:  
899 10.3390/genes10010042.

900 58. Gostinčar C. Towards genomic criteria for delineating fungal species. *J Fungi*.  
901 2020; doi: 10.3390/jof6040246.

902 59. Fogelqvist J, Tzelepis G, Bejai S, Ilbäck J, Schwelm A, Dixelius C. Analysis of the  
903 hybrid genomes of two field isolates of the soil-borne fungal species *Verticillium*  
904 *longisporum*. *BMC Genomics*. 2018; doi: 10.1186/s12864-017-4407-x.

905 60. Michelotti LA, Sun S, Heitman J, James TY. Clonal evolution in serially passaged  
906 *Cryptococcus neoformans* x *deneoformans* hybrids reveals a heterogenous landscape  
907 of genomic change. Stajich J, editor. *Genetics*. 2022; doi: 10.1093/genetics/iyab142.

908 61. Steenwyk JL, Lind AL, Ries LNA, dos Reis TF, Silva LP, Almeida F, et al..

909 Pathogenic allodiploid hybrids of *Aspergillus* fungi. *Curr Biol.* 2020; doi:  
910 10.1016/j.cub.2020.04.071.

911 62. Fang C, Zhong H, Lin Y, Chen B, Han M, Ren H, et al.. Assessment of the cPAS-  
912 based BGISEQ-500 platform for metagenomic sequencing. *Gigascience.* 2018; doi:  
913 10.1093/gigascience/gix133.

914 63. Huang S, Kang M, Xu A. HaploMerger2: rebuilding both haploid sub-assemblies  
915 from high-heterozygosity diploid genome assembly. Berger B, editor. *Bioinformatics.*  
916 2017; doi: 10.1093/bioinformatics/btx220.

917 64. Li H, Handsaker B, Wysoker A, Fennell T, Ruan J, Homer N, et al.. The Sequence  
918 Alignment/Map format and SAMtools. *Bioinformatics.* 2009; doi:  
919 10.1093/bioinformatics/btp352.

920 65. Alkan C, Coe BP, Eichler EE. GATK toolkit. *Nat Rev Genet.* 2011; doi:  
921 10.1038/nrg2958.

922 66. R Development Core Team. R: A language and environment for statistical  
923 computing. Vienna, Austria: R Foundation for Statistical Computing;

924 67. Jombart T, Ahmed I. adegenet 1.3-1: new tools for the analysis of genome-wide  
925 SNP data. *Bioinformatics.* 2011; doi: 10.1093/bioinformatics/btr521.

926 68. Schliep K, Potts AJ, Morrison DA, Grimm GW. Intertwining phylogenetic trees and  
927 networks. *Methods Ecol Evol.* 2017; doi: 10.1111/2041-210X.12760.

928 69. Kamvar ZN, Brooks JC, Grünwald NJ. Novel R tools for analysis of genome-wide  
929 population genetic data with emphasis on clonality. *Front Genet.* 2015; doi:  
930 10.3389/fgene.2015.00208.

931 70. Danecek P, Auton A, Abecasis G, Albers CA, Banks E, DePristo MA, et al.. The  
932 variant call format and VCFtools. *Bioinformatics.* 2011; doi:  
933 10.1093/bioinformatics/btr330.

934 71. Wickham H. ggplot2. Cham: Springer International Publishing;

935 72. Peng Y, Leung HCM, Yiu SM, Chin FYL. IDBA-UD: A *de novo* assembler for single-  
936 cell and metagenomic sequencing data with highly uneven depth. *Bioinformatics.*  
937 2012; doi: 10.1093/bioinformatics/bts174.

938 73. Stanke M, Morgenstern B. AUGUSTUS: a web server for gene prediction in  
939 eukaryotes that allows user-defined constraints. *Nucleic Acids Res.* 2005; doi:  
940 10.1093/nar/gki458.

941 74. Simão FA, Waterhouse RM, Ioannidis P, Kriventseva E V., Zdobnov EM. BUSCO:  
942 Assessing genome assembly and annotation completeness with single-copy

943 orthologs. *Bioinformatics*. 2015; doi: 10.1093/bioinformatics/btv351.

944 75. Kriventseva E V., Tegenfeldt F, Petty TJ, Waterhouse RM, Simão FA, Pozdnyakov  
945 IA, et al.. OrthoDB v8: update of the hierarchical catalog of orthologs and the underlying  
946 free software. *Nucleic Acids Res*. 2015; doi: 10.1093/nar/gku1220.

947 76. Geib SM, Hall B, Derego T, Bremer FT, Cannoles K, Sim SB. Genome Annotation  
948 Generator: a simple tool for generating and correcting WGS annotation tables for NCBI  
949 submission. *Gigascience*. 2018; doi: 10.1093/gigascience/giy018.

950 77. Minkin I, Medvedev P. Scalable multiple whole-genome alignment and locally  
951 collinear block construction with SibeliaZ. *Nat Commun*. 2020; doi: 10.1038/s41467-  
952 020-19777-8.

953 78. Talavera G, Castresana J. Improvement of phylogenies after removing divergent  
954 and ambiguously aligned blocks from protein sequence alignments. *Syst Biol*. 2007;  
955 doi: 10.1080/10635150701472164.

956 79. Minh BQ, Schmidt HA, Chernomor O, Schrempf D, Woodhams MD, von Haeseler  
957 A, et al.. IQ-TREE 2: New models and efficient methods for phylogenetic inference in  
958 the genomic era. Teeling E, editor. *Mol Biol Evol*. 2020; doi: 10.1093/molbev/msaa015.

959 80. Huson DH, Bryant D. Application of phylogenetic networks in evolutionary studies.  
960 *Mol Biol Evol*. 2006; doi: 10.1093/molbev/msj030.

961 81. Revell LJ. phytools: an R package for phylogenetic comparative biology (and other  
962 things). *Methods Ecol Evol*. 2012; doi: 10.1111/j.2041-210X.2011.00169.x.

963 82. Mistry J, Chuguransky S, Williams L, Qureshi M, Salazar GA, Sonnhammer ELL,  
964 et al.. Pfam: The protein families database in 2021. *Nucleic Acids Res*. 2021; doi:  
965 10.1093/nar/gkaa913.

966 83. Katoh K, Standley DM. MAFFT multiple sequence alignment software version 7:  
967 improvements in performance and usability. *Mol Biol Evol*. 2013; doi:  
968 10.1093/molbev/mst010.

969 84. Altschul S. Gapped BLAST and PSI-BLAST: a new generation of protein database  
970 search programs. *Nucleic Acids Res*. 1997; doi: 10.1093/nar/25.17.3389.

971 85. Gostinčar C, Sun X, Černoša A, Fang C, Gunde-Cimerman N, Song Z. Supporting  
972 data for "Clonality, inbreeding, and hybridization in two extremotolerant black yeasts"  
973 GigaScience Database 2022. <http://dx.doi.org/10.5524/102257>

974

975

976 **Table 1.** *Hortaea werneckii* strains analysed in this study.

| Culture collection strain number | Present study number* | Isolation habitat                                          | Sampling site location                  | Ploidy |
|----------------------------------|-----------------------|------------------------------------------------------------|-----------------------------------------|--------|
| EXF-9                            | 1                     | brine                                                      | Ebre Delta salterns, Spain              | 1      |
| EXF-12                           | 2                     | brine                                                      | Santa Pola salterns, Spain              | 1      |
| EXF-15                           | 3                     | brine                                                      | Santa Pola salterns, Spain              | 1      |
| EXF-20                           | 4                     | brine                                                      | Santa Pola salterns, Spain              | 2      |
| EXF-152                          | 5                     | brine                                                      | Sečovlje salterns, Slovenia             | 2      |
| EXF-153, EXF-2781                | 6                     | brine                                                      | Sečovlje salterns, Slovenia             | 2      |
| EXF-154                          | 7                     | brine                                                      | Sečovlje salterns, Slovenia             | 2      |
| EXF-156, CBS 116.90              | 8                     | eye infection of aquarium<br><i>Spondylisoma cantharus</i> | unknown                                 | 2      |
| EXF-157, CBS 115.90              | 9                     | kidney of <i>Bufo granulosus</i>                           | Brazil                                  | 1      |
| EXF-161, EXF-2689,<br>CBS 706.76 | 10                    | leaf of <i>Rhizophora mangle</i>                           | Senegal                                 | 2      |
| EXF-166, CBS 100496              | 11                    | sea water-sprayed marble                                   | Delos, Greece                           | 2      |
| EXF-177, CBS 705.76              | 12                    | <i>tinea nigra</i>                                         | France                                  | 1      |
| EXF-241                          | 13                    | brine                                                      | Sečovlje salterns, Slovenia             | 2      |
| EXF-269, EXF-108                 | 14                    | brine                                                      | Santa Pola salterns, Spain              | 2      |
| EXF-291                          | 15                    | brine                                                      | Sečovlje salterns, Slovenia             | 2      |
| EXF-561                          | 16                    | brine                                                      | Namibia, salterns at the Atlantic coast | 1      |
| EXF-2515                         | 17                    | brine                                                      | salterns, Puerto Rico                   | 1      |
| EXF-2516                         | 18                    | brine                                                      | salterns, Puerto Rico                   | 1      |
| EXF-2683, CBS 117.90             | 19                    | salted fish, <i>Osteoglossum bicirrhosum</i>               | Brazil                                  | 2      |
| EXF-2685                         | 20                    | brine                                                      | Sečovlje salterns, Slovenia             | 1      |
| EXF-2783                         | 21                    | brine                                                      | Sečovlje salterns, Slovenia             | 1      |
| EXF-2785                         | 22                    | brine                                                      | Sečovlje salterns, Slovenia             | 2      |
| EXF-3845                         | 23                    | brine                                                      | Candelaria salterns, Puerto Rico        | 1      |
| EXF-3846                         | 24                    | brine                                                      | Candelaria salterns, Puerto Rico        | 1      |
| EXF-4716                         | 25                    | brine bait                                                 | Sečovlje salterns, Slovenia             | 2      |
| EXF-6274                         | 26                    | brine                                                      | Sečovlje salterns, Slovenia             | 2      |
| EXF-6652                         | 27                    | spider web in a cave close to the ocean                    | Atacama, Chile                          | 2      |
| EXF-6663                         | 28                    | spider web in a cave close to the ocean                    | Atacama, Chile                          | 1      |
| EXF-8170                         | 29                    | brine                                                      | Sečovlje salterns, Slovenia             | 2      |
| EXF-8422                         | 30                    | biofilm from cheese factory<br>brine                       | Celje, Slovenia                         | 2      |
| EXF-10304                        | 31                    | brine                                                      | Sečovlje salterns, Slovenia             | 2      |
| EXF-10508                        | 32                    | sea water, depth 25 m                                      | Italy                                   | 2      |
| EXF-10509                        | 33                    | sea water, depth 200 m                                     | Italy                                   | 2      |
| EXF-10510                        | 34                    | sea water, depth 94 m                                      | Italy                                   | 2      |
| EXF-10511                        | 35                    | sea water, depth 25 m                                      | Italy                                   | 2      |
| EXF-10512                        | 36                    | sea water, depth 25 m                                      | Italy                                   | 4      |
| EXF-10816                        | 37                    | bittern after halite precipitation                         | Sečovlje salterns, Slovenia             | 2      |
| EXF-10819                        | 38                    | bittern after halite precipitation                         | Sečovlje salterns, Slovenia             | 2      |
| EXF-10820                        | 39                    | bittern after halite precipitation                         | Sečovlje salterns, Slovenia             | 1      |
| EXF-10843                        | 40                    | brine                                                      | Sečovlje salterns, Slovenia             | 2      |
| EXF-10904                        | 41                    | bittern after halite precipitation                         | Sečovlje salterns, Slovenia             | 2      |

|                      |      |                                         |                                  |   |
|----------------------|------|-----------------------------------------|----------------------------------|---|
| EXF-10907            | 42   | bittern after halite precipitation      | Sečovlje salterns, Slovenia      | 2 |
| EXF-10919            | 43   | bittern after halite precipitation      | Sečovlje salterns, Slovenia      | 2 |
| EXF-10958            | 44   | bittern after halite precipitation      | Sečovlje salterns, Slovenia      | 1 |
| EXF-10974            | 45   | brine                                   | Sečovlje salterns, Slovenia      | 2 |
| EXF-11540            | 46   | sand in a cave close to the ocean       | Atacama, Chile                   | 2 |
| EXF-11650            | 47   | sand in a cave close to the ocean       | Atacama, Chile                   | 2 |
| EXF-11651            | 48   | sand in a cave close to the ocean       | Atacama, Chile                   | 1 |
| EXF-12619            | 49   | coral or deep sea                       | China                            | 1 |
| EXF-12620            | 50   | coral or deep sea                       | China                            | 2 |
| EXF-14591, CMF-020   | 51   | plankton tow                            | Vineyard Sound, USA              | 2 |
| EXF-14592, AMF 061   | 52   | plankton tow                            | Vineyard Sound, USA              | 1 |
| EXF-225**            | 53   | malt extract medium, 25% NaCl (w/v)     | long-term experimental evolution | 2 |
| EXF-14590, MSW 12-1B | 54   | marine                                  | List on Sylt, Germany            | 2 |
| EXF-2000             | A*** | brine                                   | Sečovlje salterns, Slovenia      | 2 |
| EXF-120              | B    | brine                                   | Santa Pola saltpans, Spain       | 2 |
| EXF-562              | C    | Soil on the sea coast                   | Namibia                          | 1 |
| EXF-2788             | D    | brine                                   | Sečovlje salterns, Slovenia      | 1 |
| EXF-171              | E    | keratomycosis                           | Brazil                           | 2 |
| EXF-2682             | F    | <i>trichomyces nigra</i>                | Italy                            | 2 |
| EXF-10513            | G    | deep sea water                          | Italy                            | 2 |
| EXF-151              | H    | <i>tinea nigra</i>                      | Portugal                         | 2 |
| EXF-6651             | I    | spider web in a cave close to the ocean | Atacama, Chile                   | 2 |
| EXF-6669             | J    | spider web in a cave close to the ocean | Atacama, Chile                   | 2 |
| EXF-6654             | K    | spider web in a cave close to the ocean | Atacama, Chile                   | 2 |
| EXF-6656             | L    | rock wall in a cave close to the ocean  | Atacama, Chile                   | 2 |

977 \* strains 1-54 were sequenced in this study; strains A-L were sequenced and named  
978 by Gostinčar et al. [1]

979 \*\* strain EXF-225 after 15 years of repeated subcultivation at 25% NaCl (w/v),  
980 continuation of experiment described in Gostinčar et al. [46]

981 \*\*\* reference *H. werneckii* genome [35]; naming of strains A-L corresponds to names  
982 in Gostinčar et al. [1]

983

984

985 **Table 2.** *Aureobasidium melanogenum* strains analysed in this study.

| Culture collection strain number | Present study number* | Isolation habitat                                           | Sampling site location | Ploidy |
|----------------------------------|-----------------------|-------------------------------------------------------------|------------------------|--------|
| EXF-924                          | 1                     | ponds on sea ice                                            | Svalbard, Norway       | 1      |
| EXF-926                          | 2                     | surface glacial ice                                         | Svalbard, Norway       | 2(?)** |
| EXF-3233                         | 3                     | deep sea (4500 m b.s.l.)                                    | Japan                  | 1      |
| EXF-3371                         | 4                     | soil                                                        | Thailand               | 1      |
| EXF-3378                         | 5                     | public fountain                                             | Thailand               | 1      |
| EXF-3397                         | 6                     | endoperitoneal fluid                                        | Greece                 | 2      |
| EXF-4450                         | 8                     | Iskra factory                                               | Slovenia               | 2      |
| EXF-5590                         | 9                     | dishwasher rubber seal                                      | Slovenia               | 2      |
| EXF-6171                         | 10                    | glacial ice                                                 | Argentina              | 2      |
| EXF-7932                         | 11                    | metal drain on the kitchen sink                             | Sweden                 | 1      |
| EXF-7946                         | 12                    | kitchen metal holder for washed dishes                      | Sweden                 | 1      |
| EXF-8016                         | 13                    | bathroom faucet and sink contact                            | Sweden                 | 1      |
| EXF-8022                         | 14                    | refrigerator inner surface                                  | Sweden                 | 1      |
| EXF-8044                         | 15                    | kitchen metal holder for washed dishes                      | Sweden                 | 1      |
| EXF-8258                         | 16                    | well water                                                  | Slovenia               | 2      |
| EXF-9877                         | 17                    | tap water                                                   | Slovenia               | 2      |
| EXF-11403                        | 18                    | refrigerator inner surface                                  | Sweden                 | 2(?)** |
| EXF-8492                         | 19                    | well water                                                  | Slovenia               | 2      |
| EXF-8678                         | 20                    | well water                                                  | Slovenia               | 2      |
| EXF-8689                         | 21                    | well water                                                  | Slovenia               | 2      |
| EXF-8695                         | 22                    | well water                                                  | Slovenia               | 2      |
| EXF-8702                         | 23                    | well water                                                  | Slovenia               | 2      |
| EXF-8986                         | 24                    | fango mud from Sečovlje salterns                            | Slovenia               | 2      |
| EXF-9262                         | 25                    | rubber on kitchen drain                                     | Slovenia               | 1      |
| EXF-9470                         | 26                    | kitchen counter above dishwasher                            | Slovenia               | 2      |
| EXF-9272                         | 27                    | kitchen strainer basket                                     | Slovenia               | 1      |
| EXF-9298                         | 28                    | plastic mesh on kitchen drain                               | Slovenia               | 2      |
| EXF-9304                         | 29                    | kitchen strainer basket                                     | Slovenia               | 2      |
| EXF-9313                         | 30                    | kitchen sink                                                | Slovenia               | 2      |
| EXF-9454                         | 31                    | tap water                                                   | Slovenia               | 2      |
| EXF-9484                         | 32                    | kitchen counter above dishwasher                            | Slovenia               | 2      |
| EXF-9887                         | 33                    | tap water                                                   | Slovenia               | 2      |
| EXF-9516                         | 34                    | kitchen sink drain                                          | Slovenia               | 2      |
| EXF-9539                         | 35                    | kitchen strainer basket                                     | Slovenia               | 1      |
| EXF-9540                         | 36                    | dishwasher door                                             | Slovenia               | 2      |
| EXF-10064                        | 37                    | tap water                                                   | Slovenia               | 2      |
| EXF-11060                        | 38                    | ceiling surface                                             | Slovenia               | 2(?)** |
| EXF-9875                         | 39                    | tap water                                                   | Slovenia               | 2      |
| EXF-9906                         | 40                    | <i>Arthrocnemum</i> sp. plant surface from Sečovlje saltern | Slovenia               | 1      |
| EXF-9911                         | 41                    | kitchen sink drain                                          | Slovenia               | 2      |
| EXF-9937                         | 42                    | kitchen sink drain                                          | Slovenia               | 2      |
| EXF-10061                        | 43                    | tap water                                                   | Slovenia               | 2      |



|           |    |                                                                                |          |   |
|-----------|----|--------------------------------------------------------------------------------|----------|---|
| EXF-10062 | 44 | tap water                                                                      | Slovenia | 2 |
| EXF-10066 | 45 | tap water                                                                      | Slovenia | 2 |
| EXF-10333 | 46 | tap water                                                                      | Slovenia | 2 |
| EXF-10372 | 47 | air in the National Gallery<br>restoration centre                              | Slovenia | 1 |
| EXF-10726 | 48 | integument of a male alate<br>ant of <i>Atta sexdens</i><br><i>rubropilosa</i> | Brazil   | 1 |
| EXF-11028 | 49 | water from the aquarium<br>with <i>Proteus anguinus</i>                        | Slovenia | 2 |

986 \* same numbering as in Černoša et al. [8]; \*\* ploidy unclear, see Černoša et al. [8]

987

988 **Table 3.** Statistics for the *H. werneckii* genomes sequenced in this study (strains 1-  
989 54).

|                                                       | haploid strains |        |       | diploid strains |        |        | tetraploid strain |
|-------------------------------------------------------|-----------------|--------|-------|-----------------|--------|--------|-------------------|
|                                                       | average         | median | SD    | average         | median | SD     | /                 |
| Coverage                                              | 730             | 619    | 464   | 469             | 485    | 177    | 276               |
| Genome assembly size (Mbp)                            | 26.52           | 26.19  | 1.47  | 49.30           | 49.22  | 1.74   | 94.67             |
| Number of contigs                                     | 796             | 638    | 421   | 6885            | 3806   | 4457   | 30312             |
| Contig N50 (kbp)                                      | 136             | 138    | 28    | 22              | 26     | 14     | 5                 |
| GC content                                            | 53.22%          | 53.33% | 0.33% | 53.40%          | 53.40% | 0.19%  | 53.40%            |
| CDS total length (Mbp)                                | 14.56           | 14.39  | 0.80  | 27.02           | 27.87  | 1.45   | 49.02             |
| CDS total length (% of genome)                        | 54.94%          | 55.27% | 1.67% | 54.80%          | 55.59% | 2.15%  | 51.78%            |
| Gene models (n)                                       | 9519            | 9344   | 665   | 20417           | 19240  | 1709   | 46596             |
| Exons per gene (average)                              | 2.34            | 2.34   | 0.06  | 2.10            | 2.20   | 0.14   | 1.87              |
| Intron average length (bp)                            | 93.17           | 93.00  | 2.53  | 94.11           | 94.00  | 4.73   | 92.00             |
| Complete BUSCOs *                                     | 95.99%          | 96.00% | 0.34% | 86.86%          | 93.40% | 10.09% | 89.60%            |
| Complete and single-copy BUSCOs                       | 95.83%          | 95.90% | 0.35% | 21.33%          | 16.30% | 10.50% | 33.20%            |
| Complete and duplicated BUSCOs                        | 0.16%           | 0.20%  | 0.06% | 65.53%          | 77.30% | 19.20% | 56.40%            |
| Fragmented BUSCOs                                     | 0.82%           | 0.75%  | 0.14% | 7.05%           | 3.20%  | 5.87%  | 5.10%             |
| Missing BUSCOs                                        | 3.19%           | 3.10%  | 0.30% | 6.09%           | 3.30%  | 4.24%  | 5.30%             |
| Total SNP density (SNPs per total genome size)        | 4.04%           | 4.54%  | 1.11% | 3.44%           | 3.56%  | 1.12%  | /                 |
| Heterozygous SNP density (SNPs per total genome size) | 0.01%           | 0.01%  | 0.01% | 2.46%           | 2.58%  | 0.74%  | /                 |

990 \* BUSCOs, Benchmarking Universal Single-Copy Orthologues.

991

992 **Figure legends**

993

994 **Figure 1.** Single-nucleotide polymorphism (SNP) diversity of *Hortaea werneckii* (**A, B**)  
995 and *Aureobasidium melanogenum* (**C, D**). Names of diploid strains are written in bold.

996 (**A, C**) Phylogenetic networks reconstructed with a Neighbor-Net algorithm from a  
997 dissimilarity distance matrix calculated from SNP data. (**B, D**) Principal component  
998 analysis of SNPs. The genomes are represented by circles. The average divergence  
999 between groups of haploid genomes (dashed lines) are expressed as millions of SNPs  
1000 (numbers next to dashed lines).

1001

1002 **Figure 2.** Linkage disequilibrium (LD) decay in *Hortaea werneckii* (**A**) and  
1003 *Aureobasidium melanogenum* (**B**). Squared correlation coefficient ( $r^2$ ) was calculated  
1004 for all pairs of non-singleton biallelic loci within the distance of 10 kbp or less and  
1005 plotted as a function of the distance between the loci (blue line). The maximum  
1006 observed value and its half value are marked with red horizontal dashed lines. A  
1007 generalized additive model curve was fitted to the data (black line).

1008

1009 **Figure 3.** Phylogenies of 50 longest alignable genomic regions of *Hortaea werneckii*  
1010 (**A, C**) and *Aureobasidium melanogenum* (**B, D**). The alignable regions were extracted  
1011 from the genomes and aligned with SibeliaZ, optimized with Gblocks, manually  
1012 inspected and used for phylogeny reconstruction with IQ-TREE and standard model  
1013 selection. (**A, B**) Overlay of 50 phylogenies for each species. Numbers on leaf nodes  
1014 represent genomes, different sequences from the same genomes (for genomes with  
1015 ploidy > 1) are distinguished with letters added to the genome numbers. Vertical lines  
1016 mark major clusters and the proportion of trees that supported them. (**C, D**) Consensus  
1017 supernetworks calculated from 50 phylogenies for each species in SplitsTree. Names  
1018 of diploid (and tetraploid) strains are written in bold, tetraploid strain is additionally  
1019 marked with an asterisk.

1020

1021 **Figure 4.** Hypothesis of the genome evolution and hybridization in *Hortaea werneckii*  
1022 (**A**) and *Aureobasidium melanogenum* (**B**). The hypothesis is based on the majority  
1023 consensus phylogeny of 50 longest alignable regions per species. Each coloured line  
1024 in the central tree represents a haploid genome. The distances between the nodes of  
1025 the tree correspond to the distances in an ultrametric majority consensus phylogeny.

1026 Haploid genomes are represented by a single coloured line in the outermost edge of  
1027 the tree, diploid genomes are represented by a double coloured line, the only tetraploid  
1028 genome is represented by four coloured lines. Around the tree, coloured symbols mark  
1029 the continent (inner circle) and habitat (outer circle) from which the strains have been  
1030 originally isolated. Black lines and numbers in the outermost circle mark the genome/  
1031 strain groups presumably originating from the same hybridization event.

1032

1033 **Figure 5.** Aneuploid regions in *Hortaea werneckii* (**A**) and *Aureobasidium*  
1034 *melanogenum* (**B**) genomes. Per-nucleotide sequencing depth of regions  
1035 corresponding to 50 and 35 longest contigs of *H. werneckii* and *A. melanogenum* were  
1036 converted into proportion of the median sequencing depth of each individual genome.  
1037 Circles represent an average of this depth in 30 kbp windows. The central horizontal  
1038 line marks the median sequencing depth of the genome. Upper and lower horizontal  
1039 lines mark the expected depth for haploid and triploid regions in an otherwise diploid  
1040 genome. Genomes with at least one putatively aneuploid region are plotted in colour.  
1041 Other genomes are plotted in light grey. Colours of strain names in the legend mark  
1042 haploid (blue) and diploid (red) genomes.

1043

1044 **Supplementary Information**

1045

1046 **Supplemental Table S1.** Statistics of *H. werneckii* genomes sequenced in this study.  
1047 Violin plots show the distribution of values in corresponding columns below the plots.

1048

1049

1050 **Supplemental Table S2.** Putative HET and HET-C proteins in different strains of *H.*  
1051 *werneckii* and *A. melanogenum*.

1052

1053 **Supplemental Figure S1.** Aneuploid regions in *Hortaea werneckii* genomes. Per-  
1054 nucleotide sequencing depth of regions corresponding to 50 longest contigs of *H.*  
1055 *werneckii* and *A. melanogenum* were converted into proportion of the median  
1056 sequencing depth of each individual genome and plotted in 50 kbp rolling median  
1057 windows (black line). Upper and lower horizontal lines mark the expected depth for  
1058 haploid and triploid regions in an otherwise diploid genome. Putatively aneuploid  
1059 region of increased ploidy are marked with red rectangles.

1060

1061 **Supplemental Figure S2.** Aneuploid regions in *Aureobasidium melanogenum*  
1062 genomes. Per-nucleotide sequencing depth of regions corresponding to 35 longest  
1063 contigs of *A. melanogenum* were converted into proportion of the median sequencing  
1064 depth of each individual genome and plotted in 50 kbp rolling median windows (black  
1065 line). Upper and lower horizontal lines mark the expected depth for haploid and triploid  
1066 regions in an otherwise diploid genome. Putatively aneuploid region of increased ploidy  
1067 are marked with red rectangles.

1068

1069 **Supplemental Figure S3.** Heterozygosity in diploid *Hortaea werneckii* and  
1070 *Aureobasidium melanogenum* genomes. Levels of heterozygosity (black lines) and  
1071 sequencing depth (purple lines) were expressed as proportions of median  
1072 heterozygosity and sequencing depth of each individual genome. The values were  
1073 plotted in 25 kbp windows across regions corresponding to 50 and 35 longest contigs  
1074 of *H. werneckii* and *A. melanogenum*, respectively. Diploid regions (i.e. with  
1075 sequencing depth similar to the rest of the diploid genome) with extensive loss of  
1076 heterozygosity are marked with red rectangles.

1077

1078 **Supplemental Figure S4.** Putative mating type loci of *Hortaea werneckii*. Visualisation  
1079 of phylogenies, presence/absence, and sequencing depth of MAT1-1 and MAT1-2  
1080 homologues, as well as an annotated alignment of the whole putative mating locus and  
1081 its flanking regions.

1082

1083 **Supplemental Figure S5.** Putative mating type loci of *Aureobasidium melanogenum*.  
1084 Visualisation of phylogenies, presence/absence and sequencing depth of MAT1-1 and  
1085 MAT1-2 homologues, as well as an annotated alignment of the whole putative mating  
1086 locus and its flanking regions.

Assoc Prof Dr Cene Gostinčar  
Department of Biology, Biotechnical Faculty, University of Ljubljana  
Jamnikarjeva 101  
SI-1000 Ljubljana  
Slovenia

Ljubljana, 29. 7. 2022

Dear Editors,

We are submitting a revised version of the manuscript of an article entitled “**Clonality, inbreeding, and hybridization in two extremotolerant black yeasts**”.

The opinions of the reviewers were generally positive. One found the studied system very “intriguing” and the other saw it as an “interesting and novel result that could spark important research into evolutionary losses of sex, speciation, and recombination rates”. However, the reviewers also requested several revisions, mostly in the form of additional analyses of the data. The revised manuscript was prepared in accordance to these requests and comments. We performed all requested analyses, amended the text, figures and tables accordingly and made (mostly minor) changes to the text, where requested by the reviewers.

The detailed list of changes and replies to the reviewers is submitted separately. Besides the revised manuscript, we are also submitting a version of the manuscript in which all the changes are clearly marked with the “track changes” option for your reference.

The manuscript is prepared as a MS Word file, with the figures submitted as separate files.

We thank the reviewers for their detailed and constructive reviews, which helped us to improve and strengthen the text. We thus hope you can re-consider the manuscript for publication.

Sincerely yours,  
Assoc Prof Dr Cene Gostinčar

We would like to thank the reviewers for their detailed and constructive feedback! Both reviewers requested revisions, which have now been made. The detailed responses to the comments of the reviewers are listed below. We believe this strengthens the manuscript and we hope you can consider it for publication.

#### Reviewer #1

Comment: separate trees were generated for "longest alignments" and I think this approach can hide potential admixture events. It is not reported anywhere what are the average lengths of these alignments, but the point is that if admixture concerns a small part of the chromosome, the alignment of the whole chromosome will not detect those admixture events. I would suggest to split all alignments into portions of equal length or of equal number of informative SNPs, to identify potential admixture events, if any exist.

Answer: The range of lengths of the alignments is now reported in the methodology: "lengths of 1364 bp to 5089 bp for *H. werneckii* and 3400 bp to 13257 bp for *A. melanogenum*". The length of these alignments was not overwhelming, therefore the masking of the admixture events was not explicitly addressed in the initial manuscript – they should be able to reflect also admixture events concerning only small parts of the chromosome. If the alignments were split further, the number of phylogenetically informative sites in them would be limited. The divergence of the genomes and likely also the difficult assembly of diploid genomes precluded the recovery of longer alignments with a 100% representation of all haploid genomes. However, as an alternative to the alignment-splitting approach, phylogenetic

trees were also constructed from core BUSCOs that were found in all genomes of each species (and in the number of copies corresponding to the ploidy of the genome). Since the number of genomes was considerable and since an unexpected copy number in even a single genome excluded the gene from the analysis, the final dataset was fairly modest. Alignments longer than 200 nucleotides and with an average of at least 15 nucleotide differences between gene pairs were used for phylogeny reconstruction, producing 22 phylogenetic trees in case of *H. werneckii* and 44 in case of *A.*

*melanogenum*. While these phylogenies are generally based on shorter alignments and are perhaps less reliable (which was the reason for reporting Sibelia and not BUSCO alignments in the manuscript), they result in almost identical topology and the proportion of trees supporting the major splits are very similar. Please see the here provided phylogeny with percentages to the right of trees marking the proportion of trees supporting the major clusters. Black percentage points are now reported in the revised Fig. 3 (in response to the comment below; calculated from phylogenies based on genomic alignments produced by Sibelia). Red numbers are the percentages of trees supporting the same clusters in trees produced from alignment of BUSCOs (provided here for review purposes only).

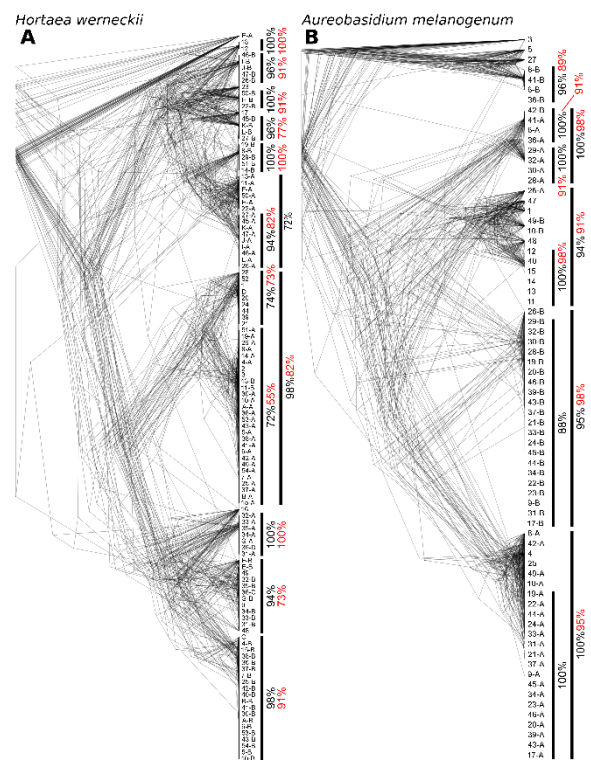

[please refer to the attached file *Answers.to.reviewers.REVIEW.ONLY.docx* for the image]

Comment: tree discordancies are not quantified in any way and from figure 3 it's hard to judge how much concordance there is. If the species cluster in several groups one could show how many topologies (proportion) of these major clusters are consistent with each other and how many are different

Answer: The proportion of phylogenies supporting the major clusters have now been labelled in panels A and B of Fig. 3 as suggested. The figure legend has been amended accordingly.

Minor comments:

Comment: Table S1 and Table 1: Please explain in the legend what distributions are showing. Also it would be helpful to include a column in the tables with information about ploidy.

Answer: The legend of Table S1 (which shows the distributions) has been amended to explain the plots in more detail. The column reporting the ploidy has been added as suggested to Table 1 and Table S1. Additionally, the ploidy column has been also added to Table 2 to keep the format of tables consistent.

Comment: line 183: I'm not sure what the authors mean by 'consistent' in this sentence. Wasn't the ploidy decided from genome assembly characteristics? In this case it's expected to be consistent.

Answer: This was an awkwardly written sentence – we did not want to say that the genomic characteristics were consistent with ploidy (which they were, because this is how the ploidy was determined, as correctly pointed out by the reviewer), but that haploid strains were very similar in their characteristics to each other, and the same was true for diploid strains. We rewrote the sentence as follows and hopefully this makes the message clearer: “The distribution of assembly size, number of predicted genes and other genomic characteristics within both haploid and diploid *H. werneckii* groups was narrow (Table 3).”

Comment: line 195: I would suggest explaining here in once sentence how SNP calling was made, especially how the reference was constructed, because it's quite important for interpreting the results.

Answer: We added a short description, as suggested: “Single-nucleotide polymorphisms (SNPs) were determined with Genome Analysis Toolkit after mapping the sequencing reads to reference genomes (haploidised genome of diploid strain EXF-2000 in case of *H. werneckii*, whole genome of haploid strain EXF-3378 in case of *A. melanogenum*).” We hope this is sufficiently detailed for the Results section, since a more detailed description is provided in the Methods.

Comment: line 202: PCA plots in Fig1: It would be useful to add ploidy information in the plot to see where are those samples located relative to haploids. Are these clusters explained by geography or habitat? Perhaps adding this information would be useful as well. It is also not mentioned anywhere how divergent are these clusters. It would be worth reporting nucleotide divergence between (haploid) genomic groups.

Answer: Diploid strains have now been marked with bold labels in all panels of Fig. 1 – PCA plots as suggested, but also in phylogenetic networks. The sizes and placement of labels have been optimized to increase legibility. The clusters can indeed be partially explained by geography/habitat – these information are visualised in Fig. 4 and discussed there as well. This decision was made after we first attempted to show the geography/habitat data in Fig. 1 (PCA plots) and discovered that the number of genomes and their considerable overlapping make an efficient visualisation all but impossible.

Divergence between clusters is now also marked in Fig. 1 with dashed lines marking the groups of haploid strains and distance in millions of SNPs between groups. The legend of the figure has been amended to reflect these changes.

Comment: line 221: Please highlight haploids/diploid on the phylogeny.

Answer: In Fig. 3, ploidy has now been marked on the phylogeny – diploid strain names have been written in bold in panels C and D. In panels A and B diploid (and tetraploid) strains were already marked with letters added to strain names – this has now been explicitly explained in the legend as well.

Comment: line 209: Considering LD decay analysis it looks to me that  $r^2$  is very low even between close variants. In general, it is not clear from the figure 2 what is the maximum  $r^2$  between adjacent pairs of SNPs (start of the line) and what is the distance over which  $r^2$  falls by half. I think the authors should give some quantification of this in the results. This could give a better understanding of the LD.

Answer: The maximum value of LD (drawn as the upper red horizontal line on the LD charts) are now also reported in the Results, as suggested: “Plotting  $r^2$  as a function of the distance between pairs of loci showed very little decay of linkage disequilibrium in either species from the maximum initial values of 0.17 for *H. werneckii* and 0.22 for *A. melanogenum*.”. Regarding the low values, the initial  $r^2$  value is not only dependent on the disequilibrium, but also on the allele frequency (i.e. alleles in less than 50% frequency that are in total disequilibrium, will have  $r^2$  not 1 but less than 1) and is therefore not unusual.

Comment: line 229: This is a really interesting way to show relationships between hybrids!

Answer: Thank you!

Comment: line 250: Fig 5, What are colours in the legend signifying?

Answer: The sentence explaining the colours was lost in revision and was now again added: “Colours of strain names in the legend mark haploid (blue) and diploid (red) genomes.” Thank you for alerting us to this!

Comment: line 282: MAT loci: One option to make sure if MAT loci is truly absent would be to look for reads matching the sequence of MAT. This could eliminate the possibility that the quality of an assembly is a source of missing loci.

Answer: The original manuscript already acknowledged the possibility that the apparently missing loci are the consequence of the assembly problems and not of their true absence. We now performed an additional analysis, as suggested. In many cases this was not helpful because the divergence of some loci is so large, that it resulted in gaps in the sequencing coverage even in cases where the putative mating-type loci were found in the assembly. In other cases, especially in *A. melanogenum*, the coverage did indeed suggest, as the reviewer thought it might, that the loci are actually present in the genome, but not present in the genome assembly. The results of the sequencing coverage analysis have been added to Supplementary Figs. 4 and 5 and the corresponding figure legends amended as appropriate. The corresponding Results section of the manuscript has been changed as follows: “While mapping of sequencing reads of some strains to the reference mating-type locus of each species contained gaps due to high divergence of the locus, in some other strains the sequencing coverage indicated the presence of the locus despite its absence in the whole-genome assembly (Supplemental Figs. S4, S5). The poor assembly of the locus was particularly problematic in diploid genomes and even more so in the tetraploid genome of *H. werneckii*, precluding a conclusive analysis in all strains. The absence of the locus in some strains should at this point in time not be seen as a conclusive result.”

Our opinion on this is that the sequencing coverage analysis comes with its own set of problems, but its inclusion does indeed provide a more complete picture of a complex situation. While a more conclusive resolution of this question can only be provided by using a sequencing technology producing longer reads, the results presented in this manuscript, while partial, do provide relevant information tightly linked to the main topic of the manuscript as well as important indications for future research, at the same time acknowledging the partiality of the results.

Comment: line 263: In the figures S4 and S5 one information that is missing is whether the same MAT type is present always on the same genomic background, assuming that these different types are in the same locus. Examples of MAT introgression are common in fungi so it would be nice to check if something like this occurs in these species.



Answer: We agree that this is an interesting question and we did some preliminary investigation into it before preparing the manuscript. However, due to the above discussed suboptimal assembly in the mating-type loci, this was only possible for some strains. Additionally, the precise borders of the mating locus in *H. werneckii* are not known. Based on all of this we decided not to report highly uncertain data and rather leave this question to be solved by a more targeted experiment, e.g. by using a sequencing technology producing long reads.

Comment: line 619: In the description of processing sequence alignments, please specify what do you mean by "long gaps"? Was there any threshold?

Answer: This was indeed not as precise as it should be. We replaced "long gaps" with "with more than 15% gaps over the whole alignment length in any of the sequences of *H. werneckii* or 25% in case of *A. melanogenum*".

## Reviewer #2

### Major:

Comment: The methods are missing a description of how ploidy was estimated, the results of which are integral to the conclusions.

Answer: Thank you for pointing this out. To correct this omission, the methods have been amended with the following paragraph: "The ploidy of the genomes was determined based on the following criteria for both species: haploids had a genome size smaller than 31 Mbp, number of predicted genes smaller than 13 000 and the average copy number of core BUSCOs (those present in all strains of the species) lower than 1.1. Diploid strains had a genome size larger than 46 Mbp, number of predicted genes greater than 18 000 and the average copy number of core BUSCOs greater than 1.5. The ploidy of genomes with any of the criteria between the above thresholds was labelled as "unclear" (Table 2).".

Comment: The authors should be clearer about how they use and what they mean by clonality and asexuality particularly with respect to recombination.

Answer: We carefully re-read the manuscript to make the use of terminology unambiguous. We use the term "asexuality" sparsely and only in the introduction, when referencing to the works of other authors, which wrote about asexuality in the sense of the absence of conventional sexual reproduction in fungi. In other parts of the manuscript we use the term "clonality" – reproduction, which produces clonal offspring. While the absence of sexual reproduction still allows for recombination (e.g. through parasexuality), the term clonality implies the absence of recombination altogether – something that is supported by genomic data for both *H. werneckii* and *A. melanogenum* (with the exception of intraspecific hybrids). We also added the short definition of clonality in the beginning of the introduction to indicate how the term is used in the manuscript: "Among the most diverse are fungi, which exhibit a wide range of strategies, from strictly clonal species, which do not recombine at all [1], to species with thousands of mating types [2]." We hope this provides the requested clarity.

### Minor:

Comment: The use of the term 'hybrid' should be preceded by the descriptor 'intraspecific' for clarity's sake

Answer: We have added the descriptor "interspecific" to the manuscript, as suggested.

Comment: A clearer description of the question/hypotheses being addressed earlier in the introduction would go a long way to improve readability.

Answer: As suggested, the hypothesis has now been briefly introduced at the end of the second paragraph of the Introduction: “Yet some species appear to be strictly clonal, even by highly sensitive measures of recombination used by population genomics, such as linkage disequilibrium [1,8]. This study focuses on two species of such strictly clonal fungi. The analysis of 115 genomes of haploid and diploid wild strains is used to test the hypothesis that even clonal phylogenetic lineages can generate diversity through hybridization that produces highly heterozygous and stable diploids.”.

*Hortaea werneckii*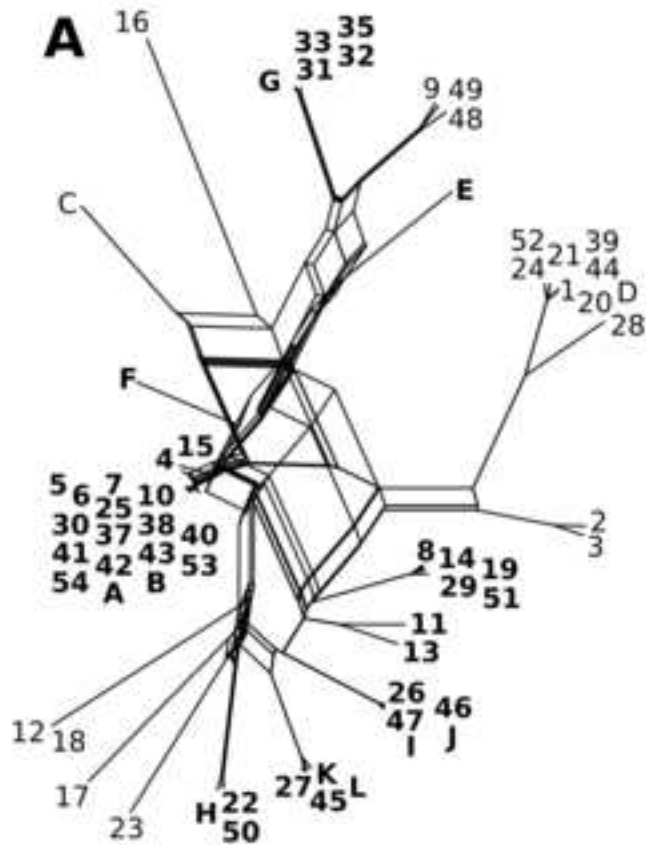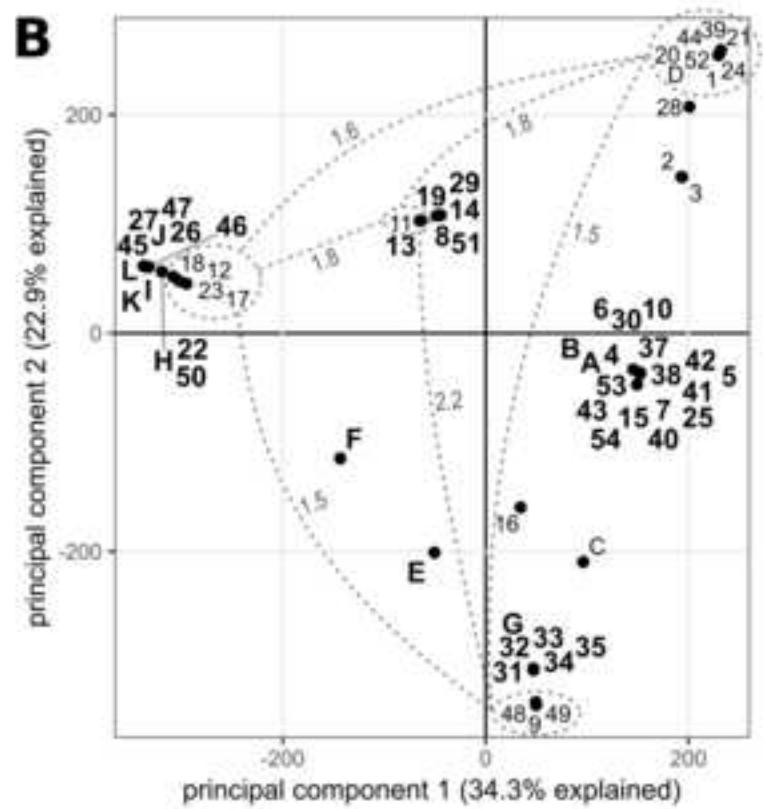*Aureobasidium melanogenum*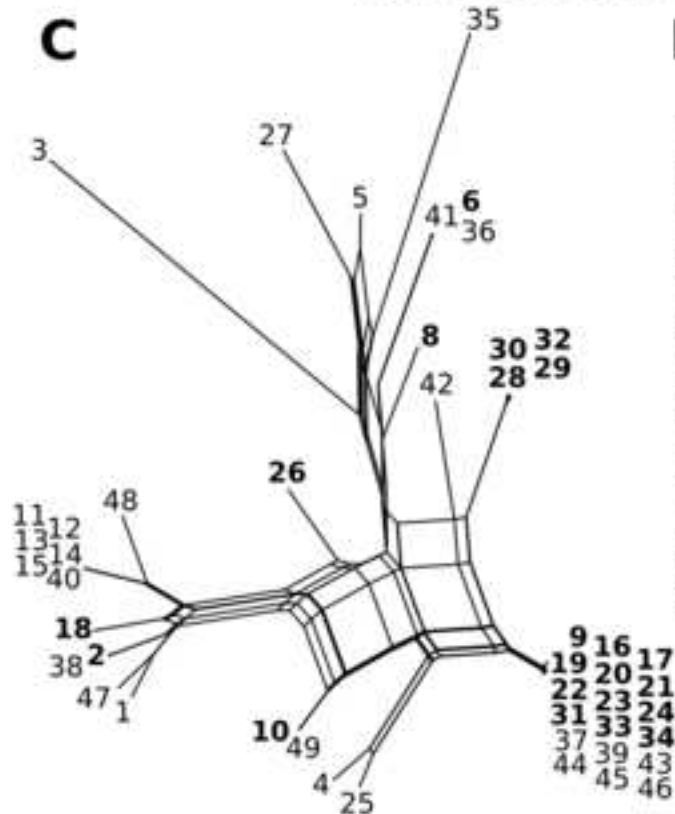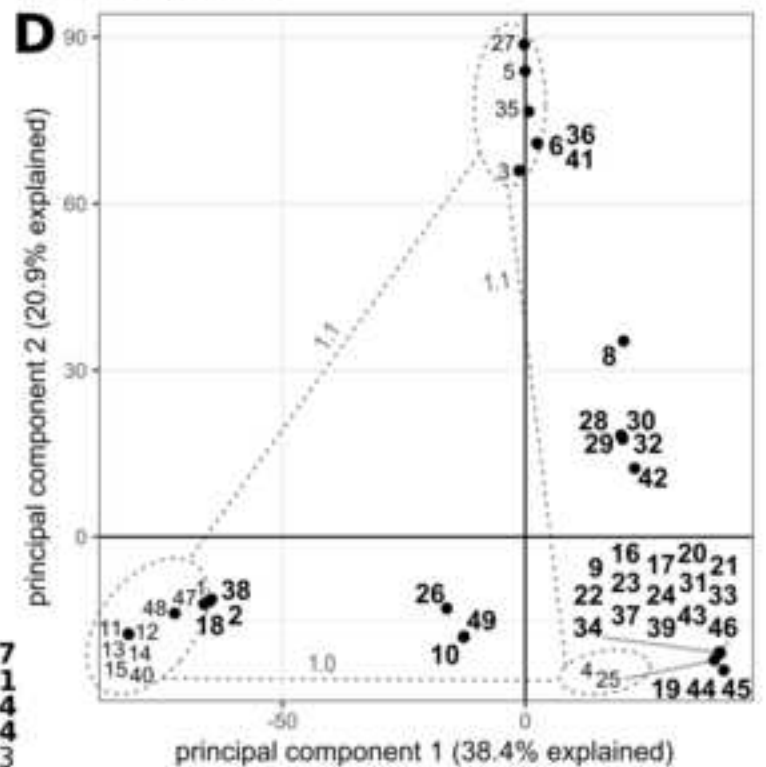

**A** *Hortaea werneckii*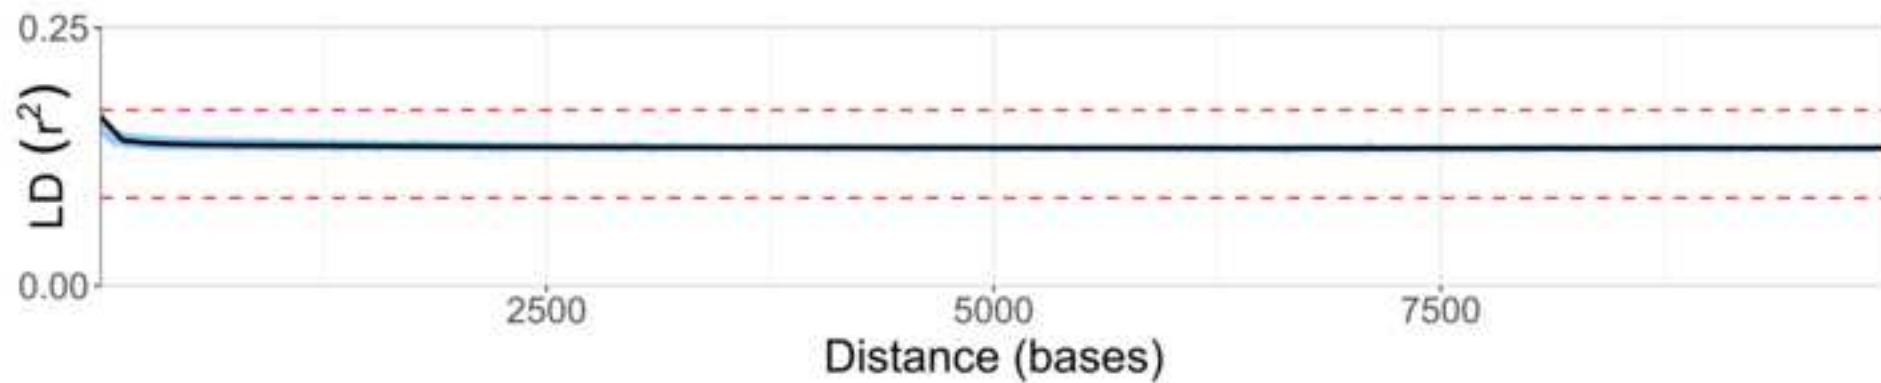**B** *Aureobasidium melanogenum*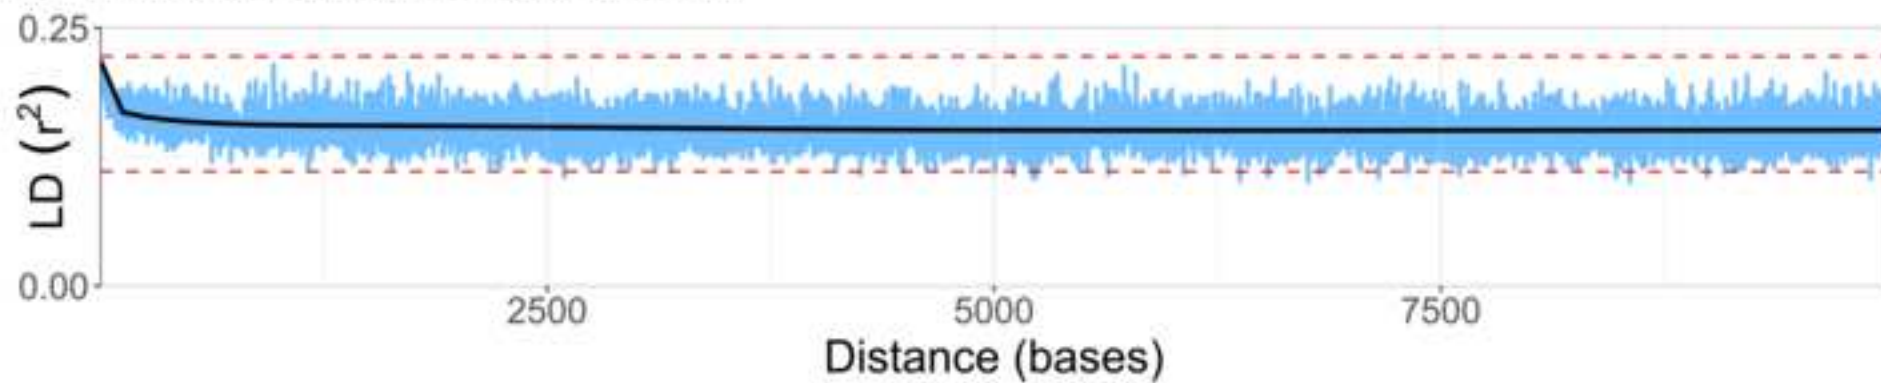

*Hortaea werneckii*

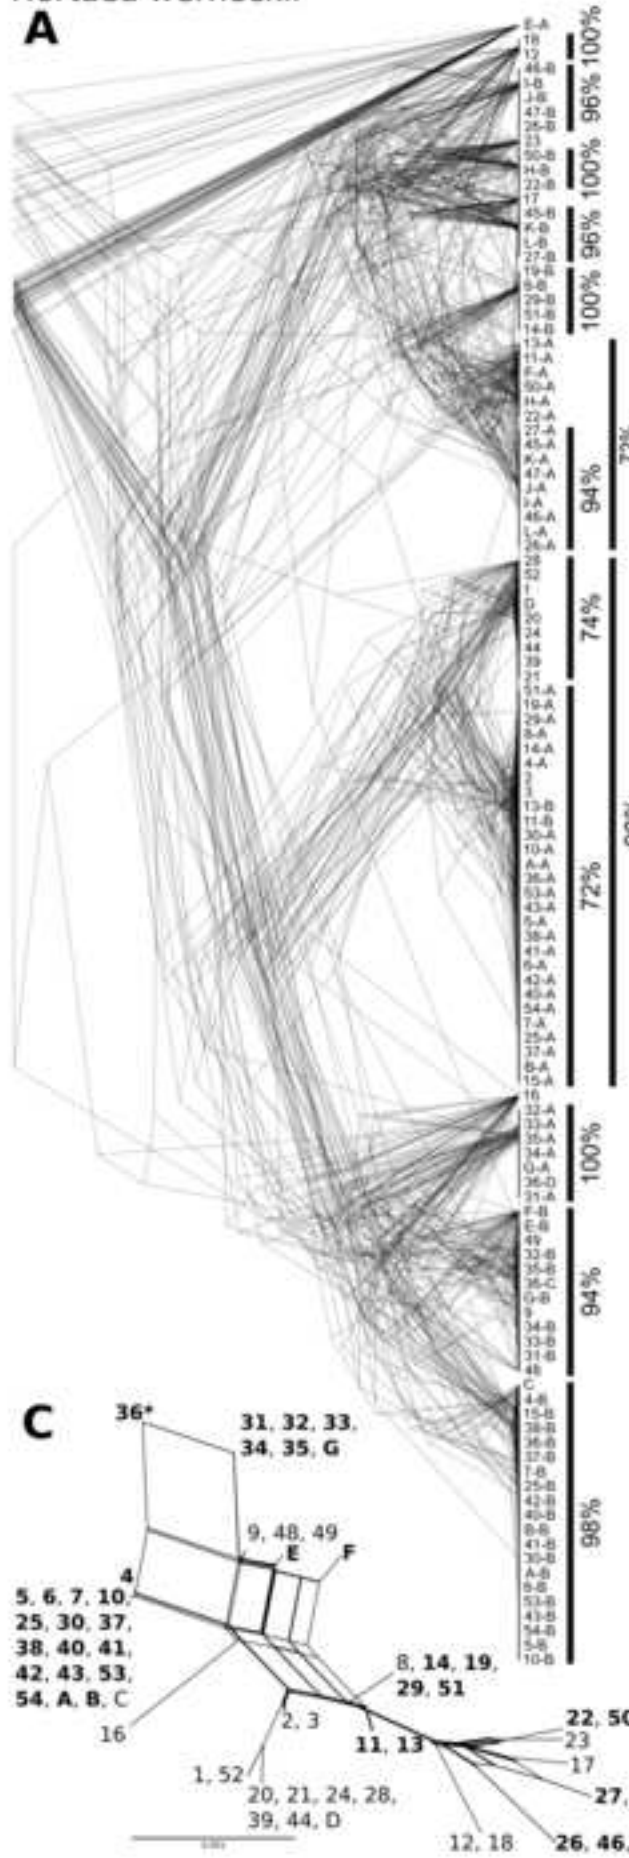

*Aureobasidium melanogenum*

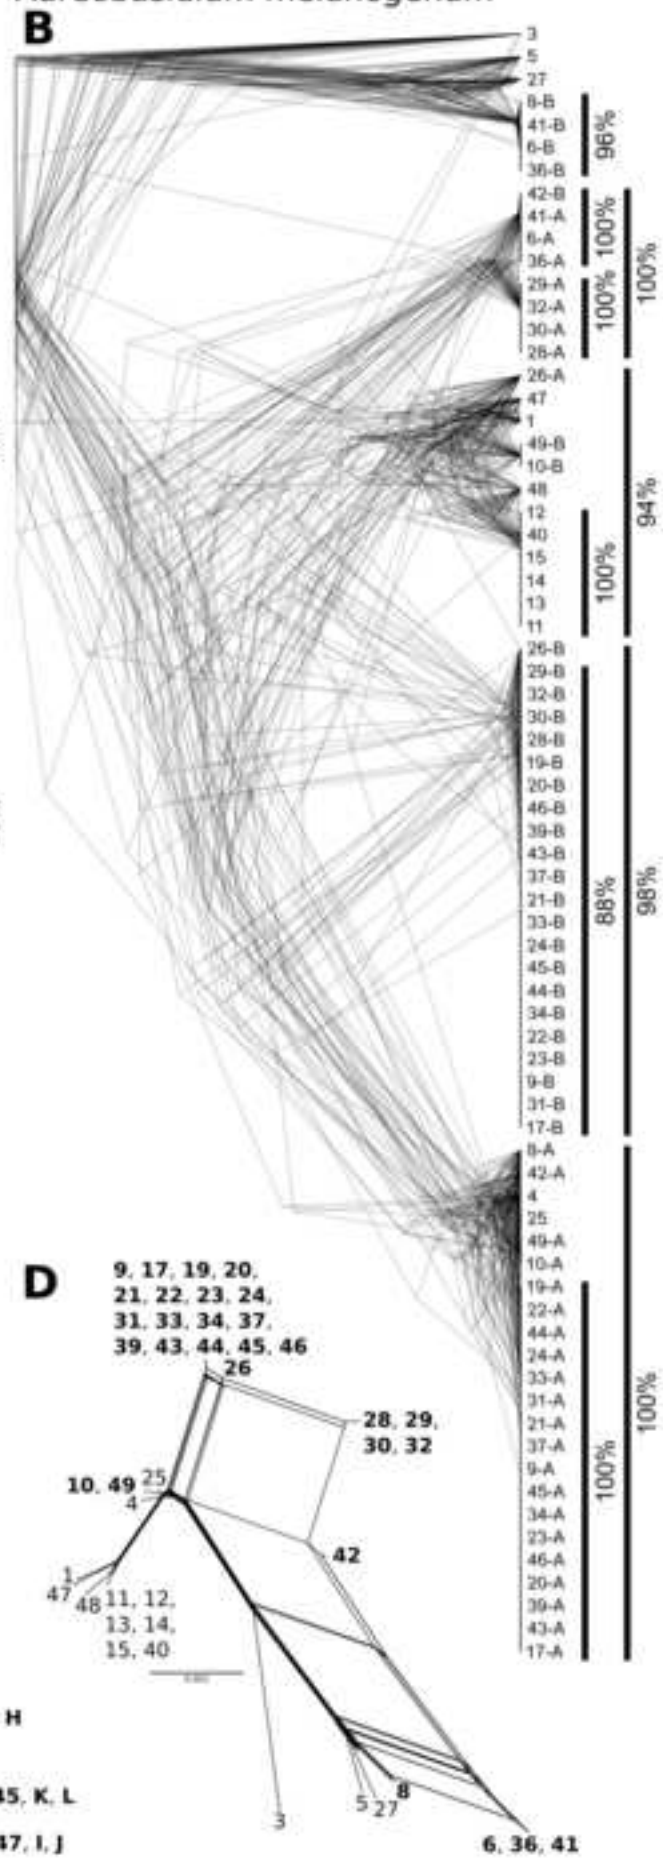

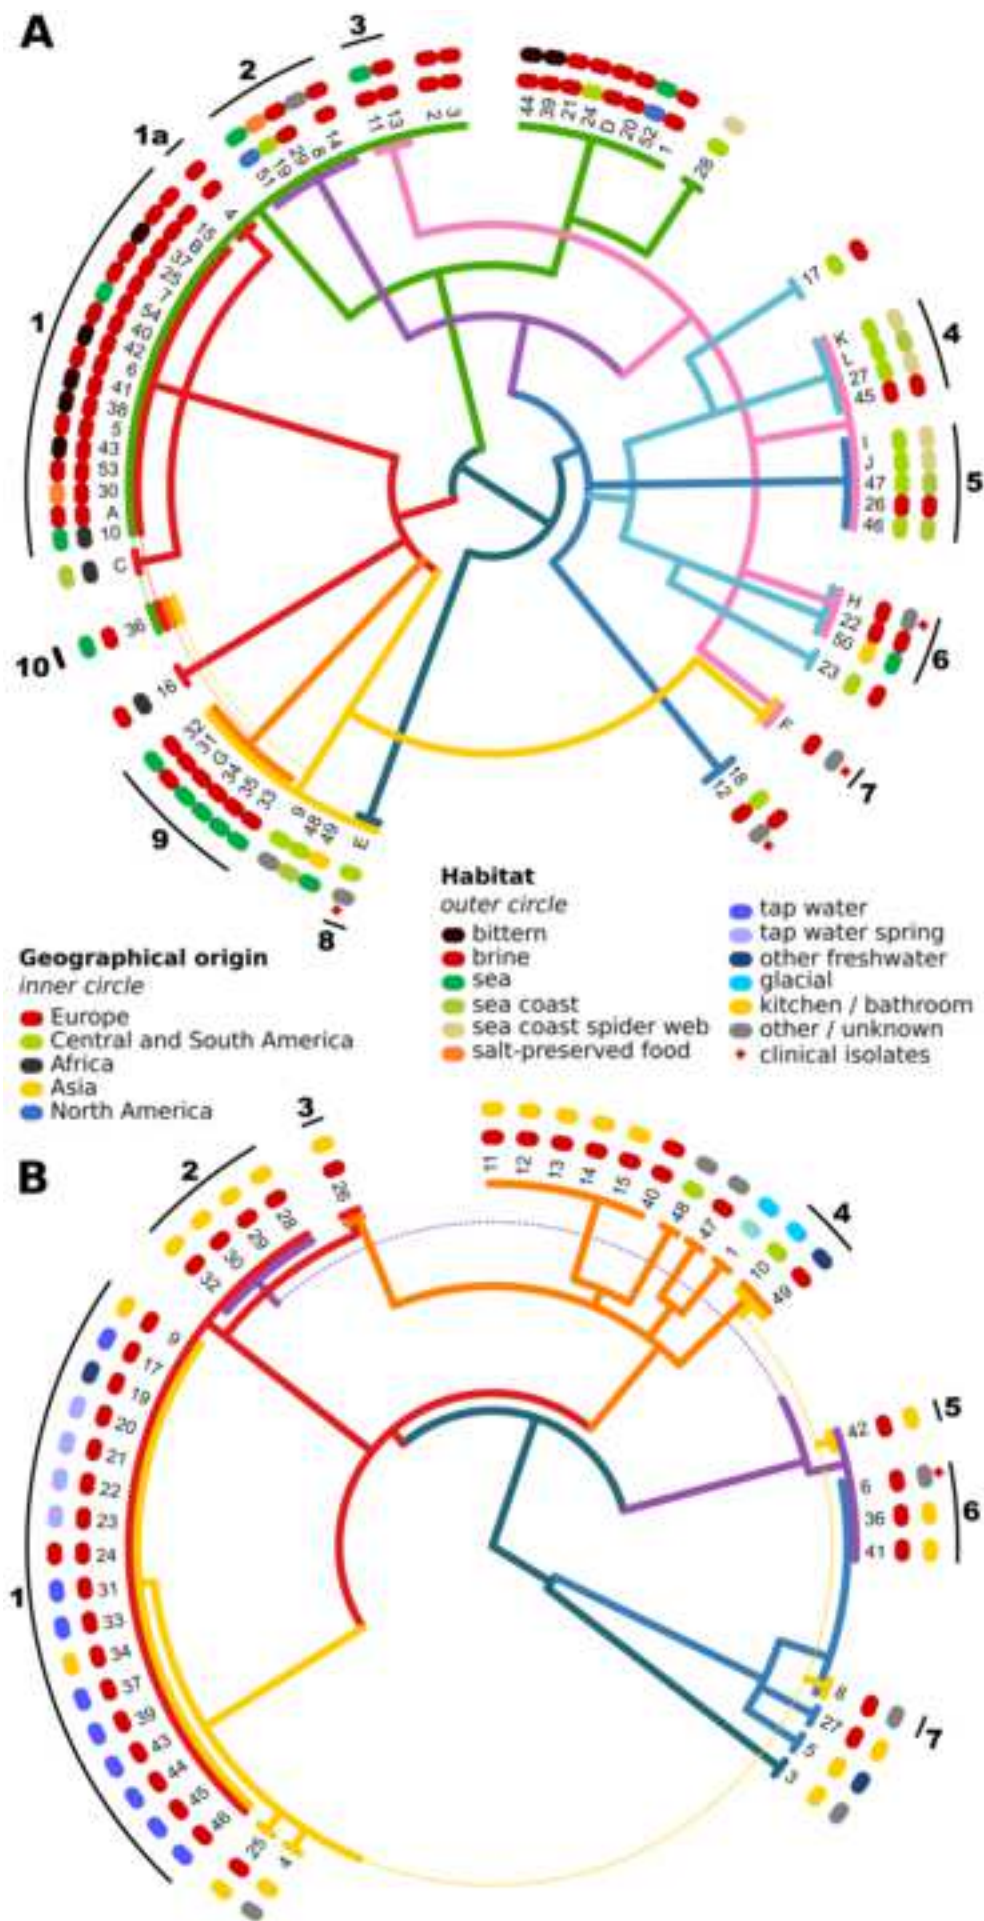

**A** *Hortaea werneckii*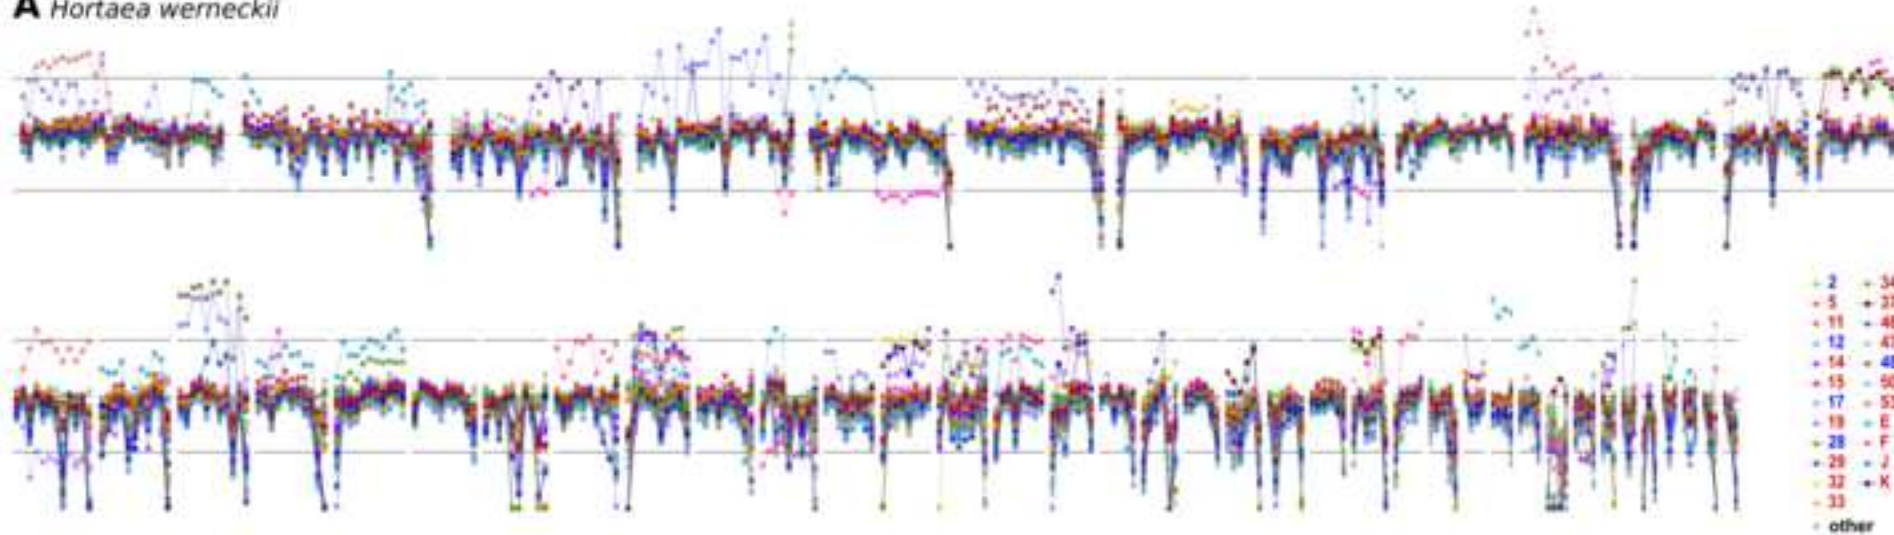**B** *Aureobasidium melanogenum*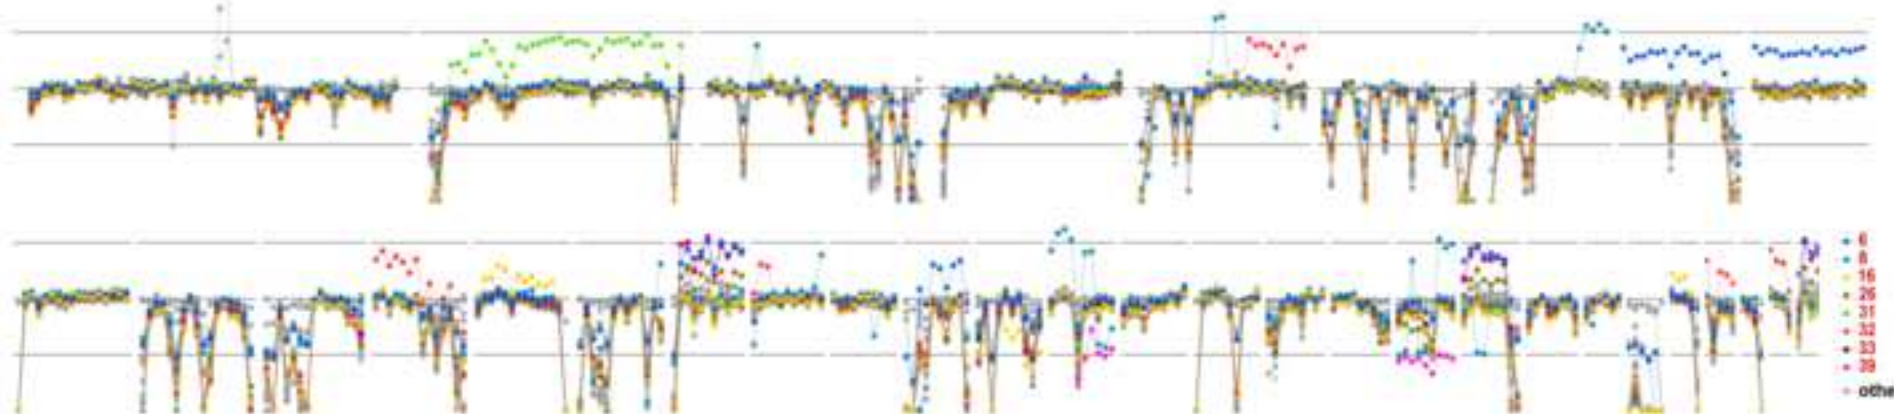

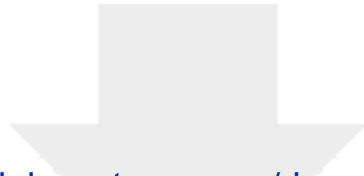

Click here to access/download  
**Supplementary Material**  
SupplementalTableS1.xlsx

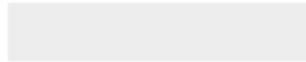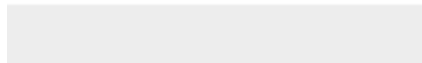





Click here to access/download  
**Supplementary Material**  
SupplementalTableS2.xlsx

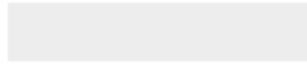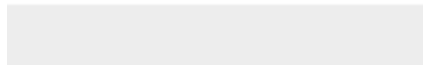

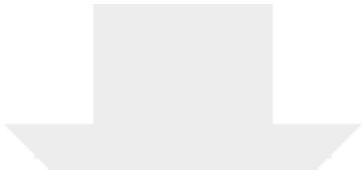

Click here to access/download  
**Supplementary Material**  
FigS1.png





Click here to access/download  
**Supplementary Material**  
FigS2.png

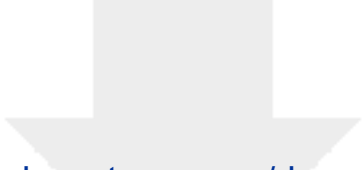

Click here to access/download  
**Supplementary Material**  
FigS3.png





Click here to access/download  
**Supplementary Material**  
FigS4.rev1.pdf





Click here to access/download  
**Supplementary Material**  
FigS5.rev1.pdf



Supplement: giac095_giga-d-22-00073_revision_1.pdf [file giac095_giga-d-22-00073_revision_1.pdf]
